# Supplementary material for: Selective oxygenation of C–H and CC bonds with H2O2 by high-spin cobalt(ii)-carboxylate complexes
Source: Royal Society of Chemistry journal article supplement (doi:10.1039/d1dt02235k), 2021-12-30
Supplement: d1dt02235k1.pdf [file d1dt02235k1.pdf]

*Electronic Supplementary Information (ESI)*

*for*

Selective Oxygenation of C-H and C=C Bonds with H<sub>2</sub>O<sub>2</sub> by High-Spin Cobalt(II)-Carboxylate Complexes

*Ivy Ghosh,<sup>a,#</sup> Biswarup Chakraborty,<sup>a,b,#</sup> Abhijit Bera,<sup>a,#</sup> Satadal Paul<sup>c</sup> and Tapan Kanti Paine<sup>a,\*</sup>*

<sup>a</sup>School of Chemical Sciences, Indian Association for the Cultivation of Science, 2A & 2B Raja S. C. Mullick Road, Jadavpur, Kolkata - 700 032, India.

<sup>b</sup>Present Address: Department of Chemistry, Indian Institute of Technology Delhi, Hauz Khas, New Delhi, Delhi - 110 016, India.

<sup>c</sup>Department of Chemistry, Bangabasi Morning College, 19, Rajkumar Chakraborty Sarani, Kolkata - 700 009, India.

**Table S1.** Crystallographic data for **1**, **2'**, **3** and **4**.

|                                                              | <b>1</b>                                                                                        | <b>2'</b>                                                                          | <b>3</b>                                                                                             | <b>4</b>                                                                            |
|--------------------------------------------------------------|-------------------------------------------------------------------------------------------------|------------------------------------------------------------------------------------|------------------------------------------------------------------------------------------------------|-------------------------------------------------------------------------------------|
| Empirical formula                                            | C <sub>208</sub> H <sub>196</sub> B <sub>4</sub> Co <sub>4</sub> N <sub>16</sub> O <sub>8</sub> | C <sub>59</sub> H <sub>55</sub> BCoN <sub>4</sub> O <sub>3</sub>                   | C <sub>424.2</sub> H <sub>399.3</sub> B <sub>8</sub> Co <sub>8</sub> N <sub>32</sub> O <sub>28</sub> | C <sub>54</sub> H <sub>53</sub> BCoN <sub>4</sub> O <sub>3</sub>                    |
| Formula weight                                               | 3326.76                                                                                         | 937.81                                                                             | 6925.72                                                                                              | 875.74                                                                              |
| Temperature/K                                                | 293.15                                                                                          | 293(2)                                                                             | 293.15                                                                                               | 293(2)                                                                              |
| Crystal system                                               | monoclinic                                                                                      | monoclinic                                                                         | triclinic                                                                                            | triclinic                                                                           |
| Space group                                                  | <i>P</i> 2 <sub>1</sub> / <i>n</i>                                                              | <i>P</i> 2 <sub>1</sub> / <i>c</i>                                                 | <i>P</i> -1                                                                                          | <i>P</i> -1                                                                         |
| <i>a</i> /Å                                                  | 21.6102(19)                                                                                     | 16.5064(6)                                                                         | 18.507(5)                                                                                            | 11.211(2)                                                                           |
| <i>b</i> /Å                                                  | 9.4202(8)                                                                                       | 11.9166(4)                                                                         | 20.425(5)                                                                                            | 14.094(3)                                                                           |
| <i>c</i> /Å                                                  | 21.831(2)                                                                                       | 27.6323(8)                                                                         | 25.548(7)                                                                                            | 14.988(3)                                                                           |
| <i>α</i> /°                                                  | 90                                                                                              | 90                                                                                 | 102.515(7)                                                                                           | 86.897(4)                                                                           |
| <i>β</i> /°                                                  | 94.067(2)                                                                                       | 119.470(2)                                                                         | 95.986(7)                                                                                            | 88.338(4)                                                                           |
| <i>γ</i> /°                                                  | 90                                                                                              | 90                                                                                 | 106.785(7)                                                                                           | 70.768(4)                                                                           |
| Volume/Å <sup>3</sup>                                        | 4433.1(7)                                                                                       | 4732.0(3)                                                                          | 8881(4)                                                                                              | 2232.6(8)                                                                           |
| <i>Z</i>                                                     | 1                                                                                               | 4                                                                                  | 1                                                                                                    | 2                                                                                   |
| <i>D</i> <sub>calc</sub> (g/cm <sup>3</sup> )                | 1.246                                                                                           | 1.316                                                                              | 1.300                                                                                                | 1.303                                                                               |
| <i>μ</i> /mm <sup>-1</sup>                                   | 0.432                                                                                           | 0.415                                                                              | 0.437                                                                                                | 0.434                                                                               |
| F(000)                                                       | 1748.0                                                                                          | 1972.0                                                                             | 3649.0                                                                                               | 874.0                                                                               |
| Crystal size/mm <sup>3</sup>                                 | 0.2 × 0.15 × 0.15                                                                               | 0.08 × 0.07 × 0.06                                                                 | 0.2 × 0.2 × 0.15                                                                                     | 0.12 × 0.1 × 0.08                                                                   |
| Radiation                                                    | MoK $\alpha$<br>( $\lambda = 0.71073$ )                                                         | MoK $\alpha$<br>( $\lambda = 0.71073$ )                                            | MoK $\alpha$<br>( $\lambda = 0.71073$ )                                                              | MoK $\alpha$<br>( $\lambda = 0.71073$ )                                             |
| 2 $\theta$ range for data collection/°                       | 2.562 to 54.268                                                                                 | 2.834 to 49.994                                                                    | 1.66 to 51.23                                                                                        | 2.722 to 57.99                                                                      |
| Index ranges                                                 | -27 ≤ <i>h</i> ≤ 27,<br>-11 ≤ <i>k</i> ≤ 12,<br>-27 ≤ <i>l</i> ≤ 27                             | -19 ≤ <i>h</i> ≤ 19,<br>-14 ≤ <i>k</i> ≤ 13,<br>-32 ≤ <i>l</i> ≤ 32                | -22 ≤ <i>h</i> ≤ 21,<br>-24 ≤ <i>k</i> ≤ 24,<br>-30 ≤ <i>l</i> ≤ 30                                  | -14 ≤ <i>h</i> ≤ 15,<br>-19 ≤ <i>k</i> ≤ 19,<br>-18 ≤ <i>l</i> ≤ 18                 |
| Reflections collected                                        | 48560                                                                                           | 43892                                                                              | 62486                                                                                                | 24996                                                                               |
| Independent reflections                                      | 9765<br>[ <i>R</i> <sub>int</sub> = 0.0750,<br><i>R</i> <sub>sigma</sub> = 0.0621]              | 8344<br>[ <i>R</i> <sub>int</sub> = 0.0398,<br><i>R</i> <sub>sigma</sub> = 0.0286] | 31871<br>[ <i>R</i> <sub>int</sub> = 0.1231,<br><i>R</i> <sub>sigma</sub> = 0.2160]                  | 10418<br>[ <i>R</i> <sub>int</sub> = 0.0273,<br><i>R</i> <sub>sigma</sub> = 0.0414] |
| Data/restraints/parameters                                   | 9765/0/544                                                                                      | 8344/0/616                                                                         | 31871/6/2262                                                                                         | 10418/162/856                                                                       |
| Goodness-of-fit on <i>F</i> <sup>2</sup>                     | 1.040                                                                                           | 1.035                                                                              | 1.081                                                                                                | 1.071                                                                               |
| Final <i>R</i> indexes [ <i>I</i> > 2 $\sigma$ ( <i>I</i> )] | <i>R</i> <sub>1</sub> = 0.0436,<br>w <i>R</i> <sub>2</sub> = 0.0943                             | <i>R</i> <sub>1</sub> = 0.0309,<br>w <i>R</i> <sub>2</sub> = 0.0738                | <i>R</i> <sub>1</sub> = 0.1287,<br>w <i>R</i> <sub>2</sub> = 0.3226                                  | <i>R</i> <sub>1</sub> = 0.0368,<br>w <i>R</i> <sub>2</sub> = 0.0809                 |

**Table S2.** Selected bond lengths (Å) and bond angles (°) of **1**.

| Distance (Å)/ Angle (°) | <b>1</b>   |
|-------------------------|------------|
| Co1-O1                  | 2.0525(14) |
| Co1-O2                  | 2.2339(14) |
| Co1-N2                  | 2.1216(17) |
| Co1-N3                  | 2.1498(16) |
| Co1-N1                  | 2.1635(17) |
| Co1-N4                  | 2.2476(17) |
| O1-Co1-O2               | 61.55(5)   |
| O1-Co1-N2               | 165.91(6)  |
| O1-Co1-N3               | 111.99(6)  |
| O1-Co1-N1               | 100.98(6)  |
| O1-Co1-N4               | 99.32(6)   |
| O2-Co1-N4               | 89.45(6)   |
| N2-Co1-O2               | 104.36(6)  |
| N2-Co1-N3               | 81.99(6)   |
| N2-Co1-N1               | 77.64(6)   |
| N2-Co1-N4               | 79.76(6)   |
| N3-Co1-O2               | 170.05(6)  |
| N3-Co1-N1               | 99.14(6)   |
| N3-Co1-N4               | 84.10(6)   |
| N1-Co1-O2               | 89.80(6)   |
| N1-Co1-N4               | 156.45(6)  |

**Table S3.** Selected bond lengths (Å) and bond angles (°) of **2'**.

| Distance (Å)/ Angle (°) | <b>2'</b>  |
|-------------------------|------------|
| Co1-O2                  | 2.0111(11) |
| Co1-O1                  | 2.1630(11) |
| Co1-N1                  | 2.2032(14) |
| Co1-N2                  | 2.1188(14) |
| Co1-N3                  | 2.1713(14) |
| Co1-N4                  | 2.2249(14) |
| O2-Co1-O1               | 75.78(4)   |
| O2-Co1-N1               | 98.95(5)   |
| O2-Co1-N2               | 168.15(5)  |
| O2-Co1-N3               | 101.71(5)  |
| O2-Co1-N4               | 109.58(5)  |
| O1-Co1-N1               | 86.38(5)   |
| O1-Co1-N3               | 91.85(5)   |
| O1-Co1-N4               | 168.46(5)  |
| N1-Co1-N4               | 82.71(5)   |
| N2-Co1-O1               | 92.38(5)   |
| N2-Co1-N1               | 79.45(5)   |
| N2-Co1-N3               | 78.87(5)   |
| N2-Co1-N4               | 81.97(5)   |
| N3-Co1-N1               | 158.15(5)  |
| N3-Co1-N4               | 96.88(5)   |

**Table S4.** Selected bond lengths (Å) and bond angles (°) of **3**.

| Distance(Å)/ Angle(°) | <b>3</b> |
|-----------------------|----------|
| Co1-O1                | 2.004(6) |
| Co1-O5                | 2.098(7) |
| Co1-N4                | 2.143(8) |
| Co1-N5                | 2.105(8) |
| Co1-N6                | 2.203(8) |
| Co1-N1                | 2.231(9) |
| O1-Co1-O5             | 77.1(3)  |
| O1-Co1-N4             | 108.7(3) |
| O1-Co1-N5             | 165.9(3) |
| O1-Co1-N6             | 94.3(3)  |
| O1-Co1-N1             | 109.8(3) |
| O5-Co1-N4             | 170.9(3) |
| O5-Co1-N5             | 92.1(3)  |
| O5-Co1-N6             | 92.4(3)  |
| O5-Co1-N1             | 89.3(3)  |
| N4-Co1-N6             | 94.1(3)  |
| N4-Co1-N1             | 82.1(3)  |
| N5-Co1-N4             | 83.1(3)  |
| N5-Co1-N6             | 76.9(3)  |
| N5-Co1-N1             | 78.7(3)  |
| N6-Co1-N1             | 155.6(3) |

**Table S5.** Selected bond lengths (Å) and bond angles (°) of **4**.

| Distance(Å)/ Angle(°) | <b>4</b>   |
|-----------------------|------------|
| Co1-N1                | 2.1136(14) |
| Co1-O2                | 2.097(6)   |
| Co1-O1                | 2.306(6)   |
| Co1-N3                | 2.1205(13) |
| Co1-N2                | 2.1733(14) |
| Co1-N4                | 2.1711(13) |
| N1-Co1-O1             | 179.07(12) |
| N1-Co1-N3             | 80.59(5)   |
| N1-Co1-N2             | 99.59(5)   |
| N1-Co1-N4             | 97.26(5)   |
| O2-Co1-N1             | 121.02(14) |
| O2-Co1-O1             | 59.89(16)  |
| O2-Co1-N3             | 157.51(14) |
| O2-Co1-N2             | 99.67(18)  |
| O2-Co1-N4             | 93.23(18)  |
| N3-Co1-O1             | 98.52(13)  |
| N3-Co1-N2             | 81.06(5)   |
| N3-Co1-N4             | 76.66(5)   |
| N2-Co1-O1             | 79.98(19)  |
| N4-Co1-O1             | 82.8(2)    |
| N4-Co1-N2             | 149.35(5)  |

**Table S6.** Catalytic oxygenation of C-H and C=C bonds complexes **1**, **2** and **3** with hydrogen peroxide (100 equiv) and carboxylic acids (for complexes **2** and **3**).

| Substrate<br>(500 equiv)             | Product(s)                             | TON of products  |                                                          |                                                         |
|--------------------------------------|----------------------------------------|------------------|----------------------------------------------------------|---------------------------------------------------------|
|                                      |                                        | Complex <b>1</b> | Complex <b>2</b> +<br>15 equiv of<br>sodium<br>benzilate | Complex <b>3</b> +<br>6 equiv of<br>sodium<br>mandelate |
| 9,10-Dihydroanthracene <sup>a</sup>  | Anthracene                             | 1.7 ± 0.1        | 1.2 ± 0.1                                                | 1.1 ± 0.3                                               |
|                                      | Anthraquinone                          | 0.3 ± 0.03       | 0.2 ± 0.02                                               | 0.2 ± 0.03                                              |
| Triphenylmethane <sup>a</sup>        | Triphenylmethanol                      | 2.5 ± 0.1        | 1.9 ± 0.5                                                | 2.2 ± 0.4                                               |
| Toluene                              | Benzyl alcohol                         | 1.4 ± 0.3        | 1 ± 0.3                                                  | 1.1 ± 0.2                                               |
|                                      | Benzaldehyde                           | 0.3 ± 0.06       | 0.3 ± 0.08                                               | 0.4 ± 0.03                                              |
| Adamantane <sup>a</sup>              | 1-Adamantanol                          | 1.6 ± 0.1        | 1.2 ± 0.4                                                | 1.2 ± 0.2                                               |
|                                      | 2-Adamantanol                          | 0.2 ± 0.01       | 0.2 ± 0.06                                               | 0.1 ± 0.03                                              |
| Cyclohexane                          | Cyclohexanol                           | 0.4 ± 0.02       | 0.3 ± 0.03                                               | 0.3 ± 0.02                                              |
|                                      | Cyclohexanone                          | 0.06 ± 0.01      | 0.04 ± 0.01                                              | 0.05 ± 0.01                                             |
| Methyl cyclohexane                   | 1-Methyl cyclohexanol                  | 0.6 ± 0.02       | 0.6 ± 0.03                                               | 0.5 ± 0.01                                              |
|                                      | 2-Methyl cyclohexanone                 | 0.07 ± 0.01      | 0.04 ± 0.03                                              | 0.06 ± 0.01                                             |
| <i>cis</i> -1,2-Dimethyl cyclohexane | <i>cis</i> -1,2-Dimethylcyclohexanol   | 0.7 ± 0.01       | 0.5 ± 0.04                                               | 0.6 ± 0.02                                              |
| <i>cis</i> -Decalin                  | <i>cis</i> -4-Decalol                  | 0.9 ± 0.02       | 0.7 ± 0.01                                               | 0.8 ± 0.02                                              |
| 1-Octene                             | 2-Hexyloxirane                         | 3.5 ± 0.3        | 2.9 ± 0.2                                                | 2.8 ± 0.1                                               |
| Cyclooctene                          | 9-Oxabicyclo[6.1.0]nonane              | 3.8 ± 0.4        | 3.0 ± 0.4                                                | 3.1 ± 0.4                                               |
| Styrene                              | 2-Phenyloxirane                        | 2.8 ± 0.3        | 2.1 ± 0.5                                                | 1.9 ± 0.3                                               |
|                                      | Benzaldehyde                           | 0.7 ± 0.04       | 0.5 ± 0.06                                               | 0.3 ± 0.08                                              |
| <i>cis</i> -2-Heptene                | <i>cis</i> -2-Butyl-3-methyl oxirane   | 2.9 ± 0.2        | 2.3 ± 0.2                                                | 2.6 ± 0.2                                               |
|                                      | <i>trans</i> -2-Butyl-3-methyl oxirane | 0.1 ± 0.04       | 0.1 ± 0.02                                               | 0.2 ± 0.03                                              |

Experimental conditions: 0.01 mmol complex, 100 equiv of H<sub>2</sub>O<sub>2</sub> and 100 equiv of substrate in acetonitrile at 25°C. <sup>a</sup>10 equiv of substrate. Reaction time: 20 h. Turnover number TON (S<sup>Ox</sup>) = mol of product/mol of catalyst.

**Table S7.** Optimized bond distances (Å) and angles (°) of **I**, **I-O2H** and **Co-O2H** and Mayer bond orders for selected bonds.

| <b>Bond distances (Å)<br/>/ Angles (°)</b> | <b>I</b> | <b>I-O2H</b> | <b>I-O2H2</b> | <b>Co-O2H</b> |
|--------------------------------------------|----------|--------------|---------------|---------------|
| Co1-N1                                     | 2.013    | 1.997        | 2.017         | 2.040         |
| Co1-N2                                     | 2.004    | 1.984        | 1.957         | 2.013         |
| Co1-N3                                     | 1.996    | 1.992        | 1.994         | 1.981         |
| Co1-N4                                     | 1.988    | 1.931        | 1.903         | 1.987         |
| Co1-O1                                     | 1.852    | 1.942        | 2.053         | 1.836         |
| Co1-O3                                     | 1.919    | 1.908        | 2.037         | 1.911         |
| O1-O2                                      | 1.383    | 1.467        | 1.463         | 1.436         |
| Co2-N5                                     | 2.052    | 1.975        | 1.970         | -----         |
| Co2-N6                                     | 1.980    | 1.928        | 1.920         | -----         |
| Co2-N7                                     | 2.337    | 2.036        | 1.972         | -----         |
| Co2-N8                                     | 2.061    | 2.017        | 2.004         | -----         |
| Co2-O4                                     | 1.919    | 1.907        | 1.950         | -----         |
| Co2-O2                                     | 1.844    | 1.860        | 1.963         | -----         |
| Co1-Co2                                    | 4.056    | 4.236        | 4.420         | -----         |
| <b>Mayer Bond Order</b>                    |          |              |               |               |
| Co1-O1                                     | 0.61     | 0.48         | 0.35          | -----         |
| Co2-O2                                     | 0.78     | 0.68         | 0.48          | -----         |



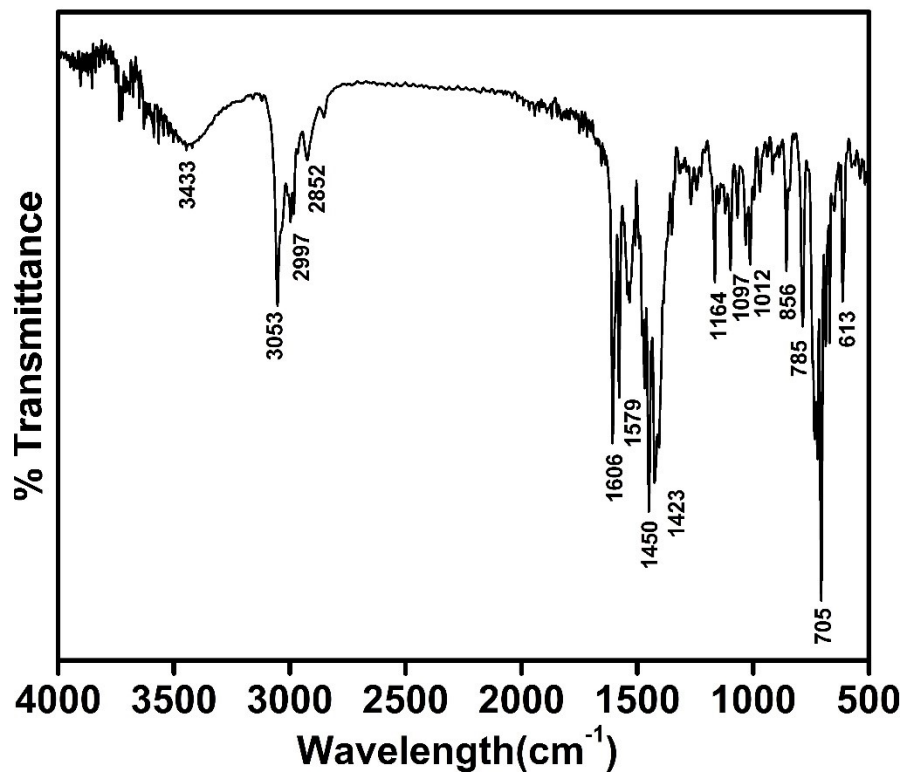

**Fig. S1.** FT-IR spectrum of [(6-Me<sub>3</sub>-TPA)Co<sup>II</sup>(benzoate)](BPh<sub>4</sub>) (1).

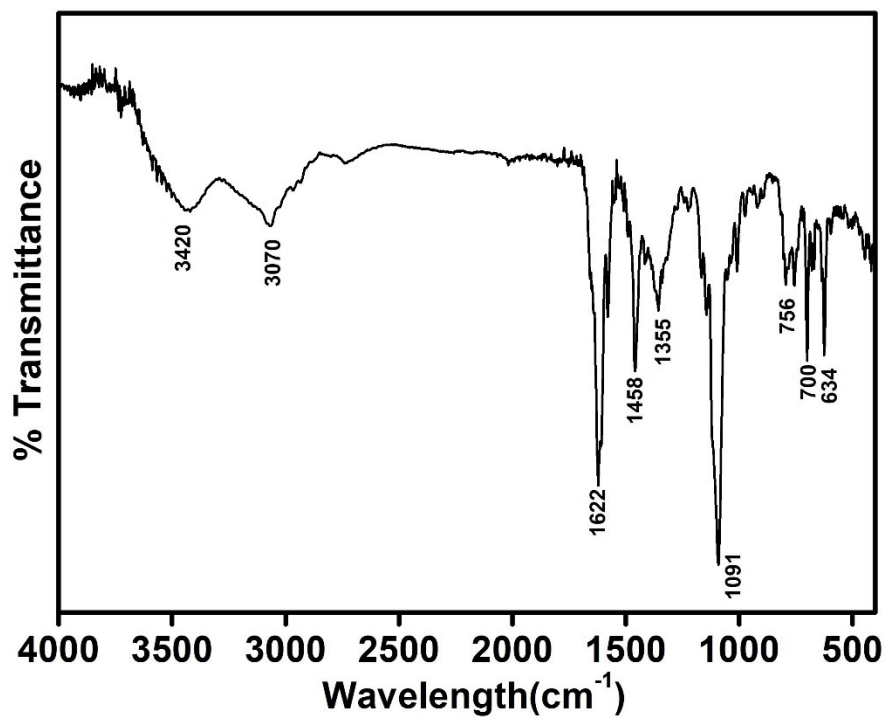

**Fig. S2.** FT-IR spectrum of [(6-Me<sub>3</sub>-TPA)Co<sup>II</sup>(benzilate)](ClO<sub>4</sub>) (2).

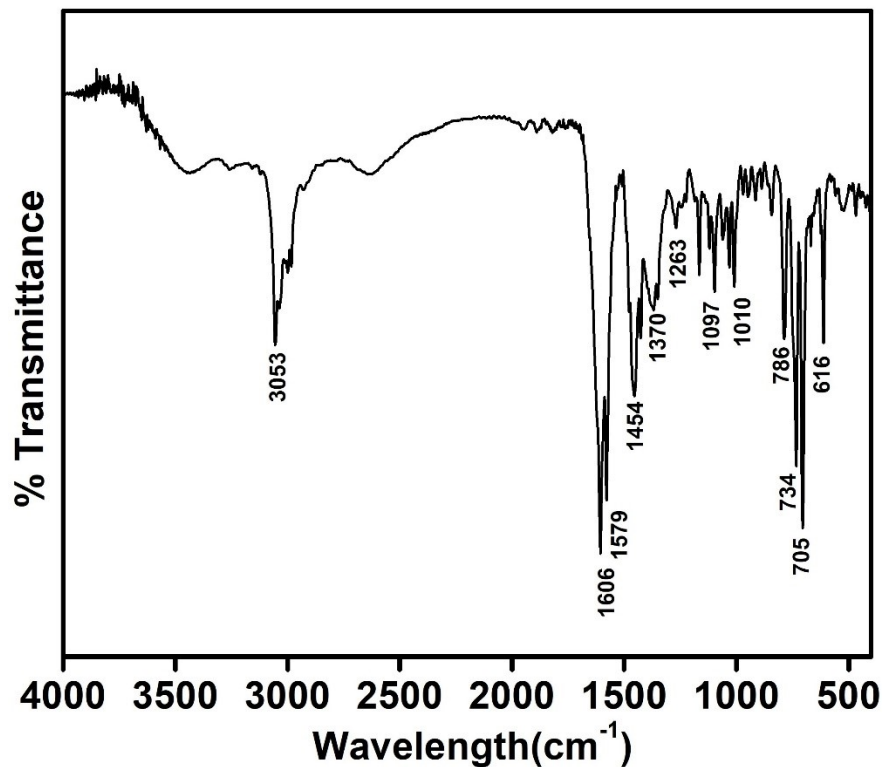

Fig. S3. FT-IR spectrum of [(6-Me<sub>3</sub>-TPA)Co<sup>II</sup>(mandelate)](BPh<sub>4</sub>) (3).

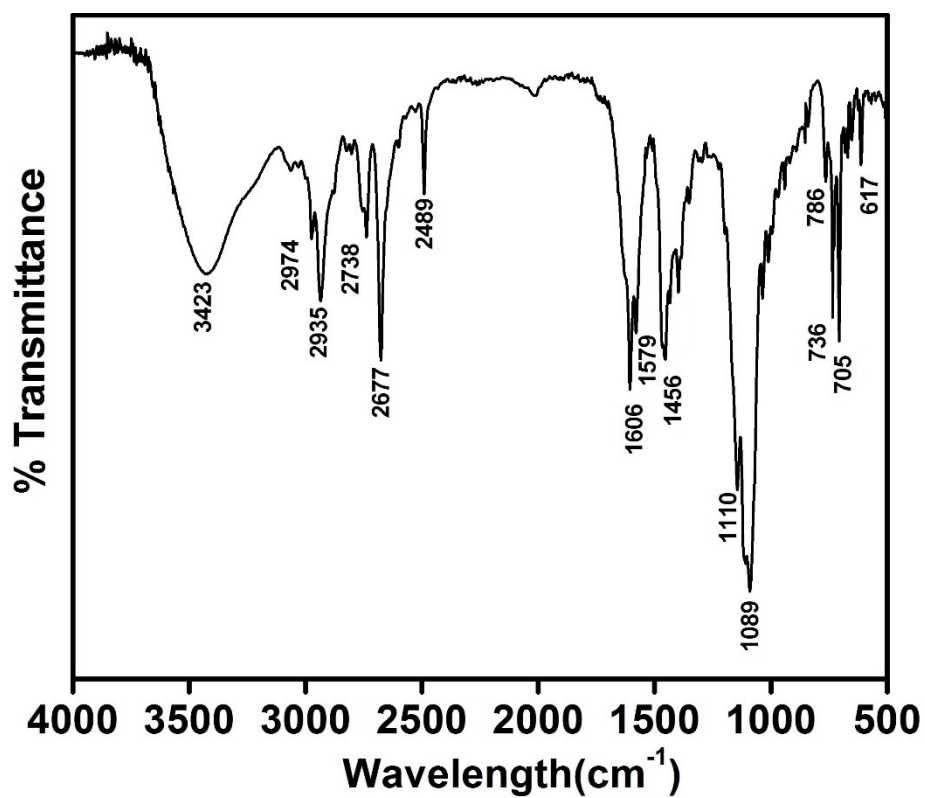

Fig. S4. FT-IR spectrum of [(6-Me<sub>3</sub>-TPA)Co<sup>II</sup>(MPA)](BPh<sub>4</sub>) (4).

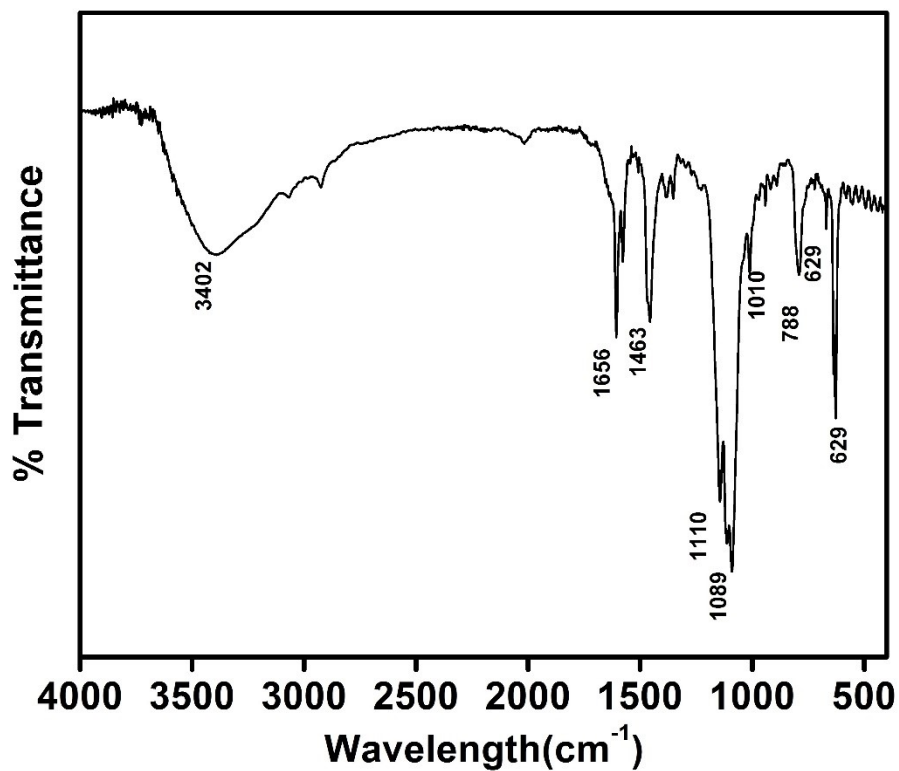

**Fig. S5.** FT-IR spectrum of  $[(6\text{-Me}_3\text{-TPA})\text{Co}^{\text{II}}(\text{CH}_3\text{CN})_2](\text{ClO}_4)_2$  (**5**).

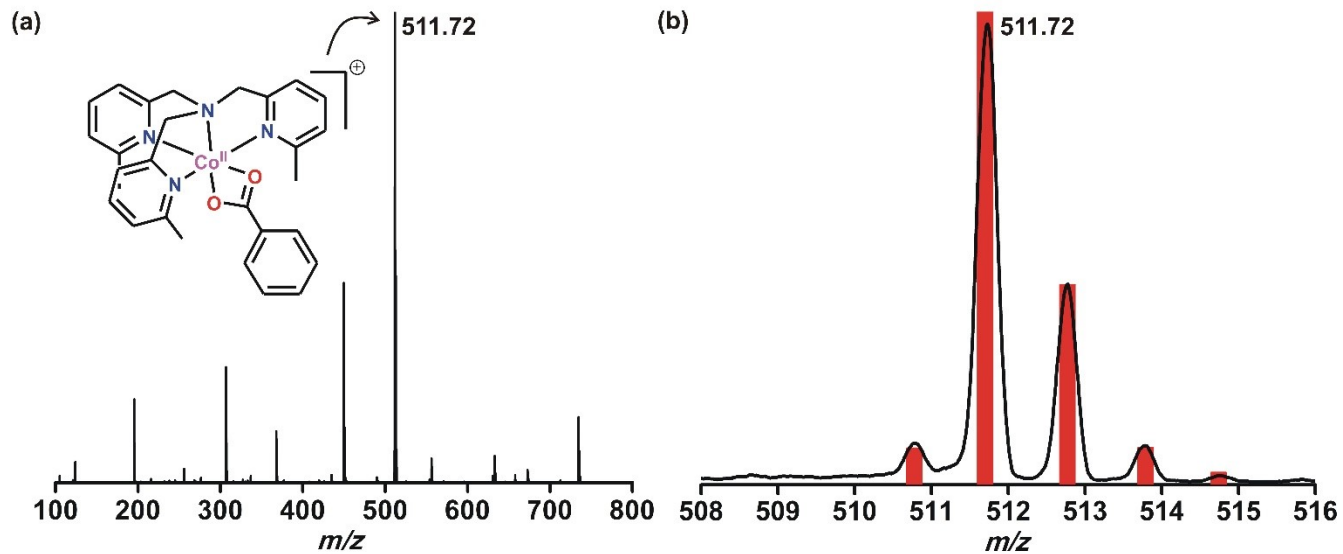

**Fig. S6.** (a) ESI-mass spectrum of  $[(6\text{-Me}_3\text{-TPA})\text{Co}^{\text{II}}(\text{benzoate})](\text{BPh}_4)$  (**1**). (b) Isotope distribution pattern of the ion peak at  $m/z$  511.72. The solid red bars indicate the calculated isotope distribution pattern.

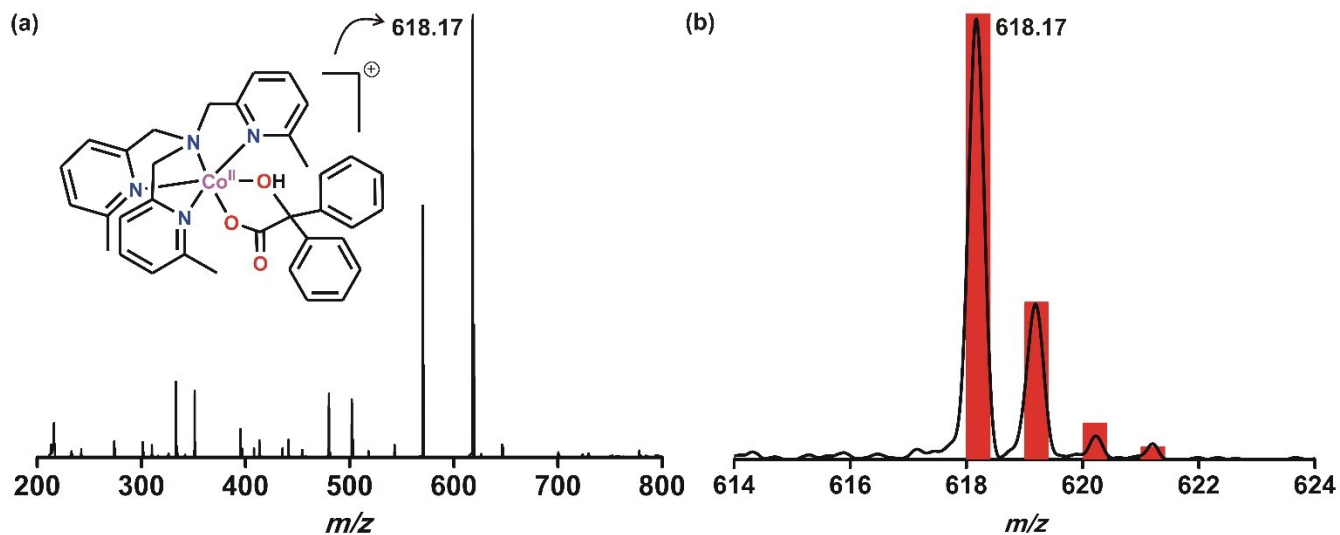

**Fig. S7.** (a) ESI-mass spectrum of  $[(6\text{-Me}_3\text{-TPA})\text{Co}^{\text{II}}(\text{benzilate})](\text{ClO}_4)$  (2). (b) Isotope distribution pattern of the ion peak at  $m/z$  618.17. The solid red bars indicate the calculated isotope distribution pattern.

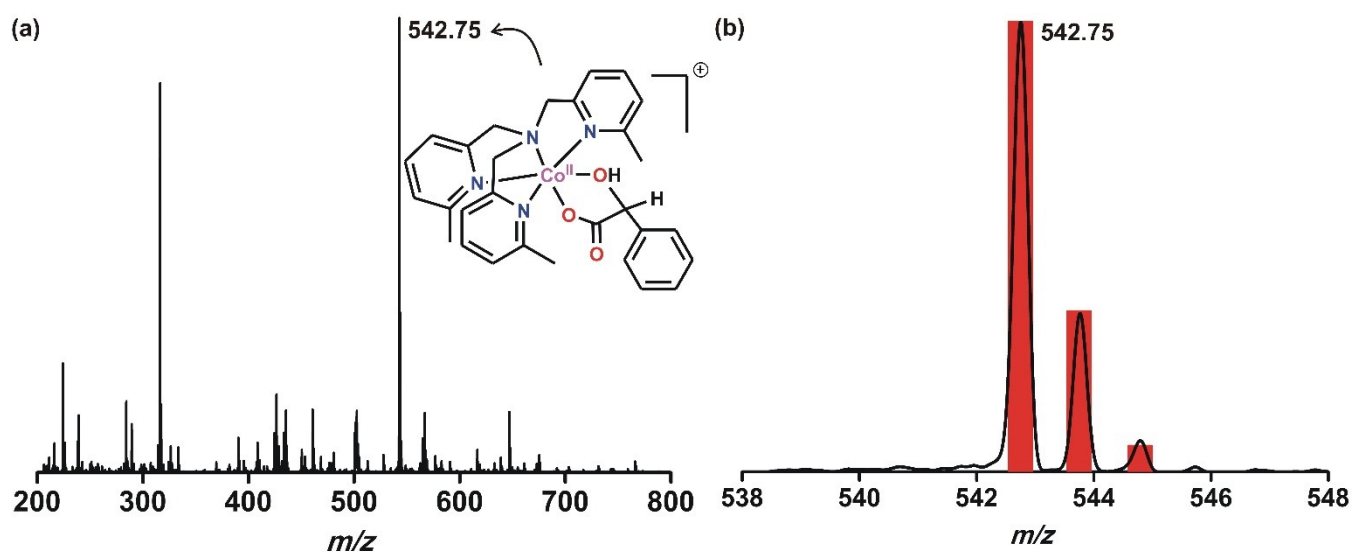

**Fig. S8.** (a) ESI-mass spectrum of  $[(6\text{-Me}_3\text{-TPA})\text{Co}^{\text{II}}(\text{mandelate})](\text{BPh}_4)$  (3). (b) Isotope distribution pattern of the ion peak at  $m/z$  542.75. The solid red bars indicate the calculated isotope distribution pattern.

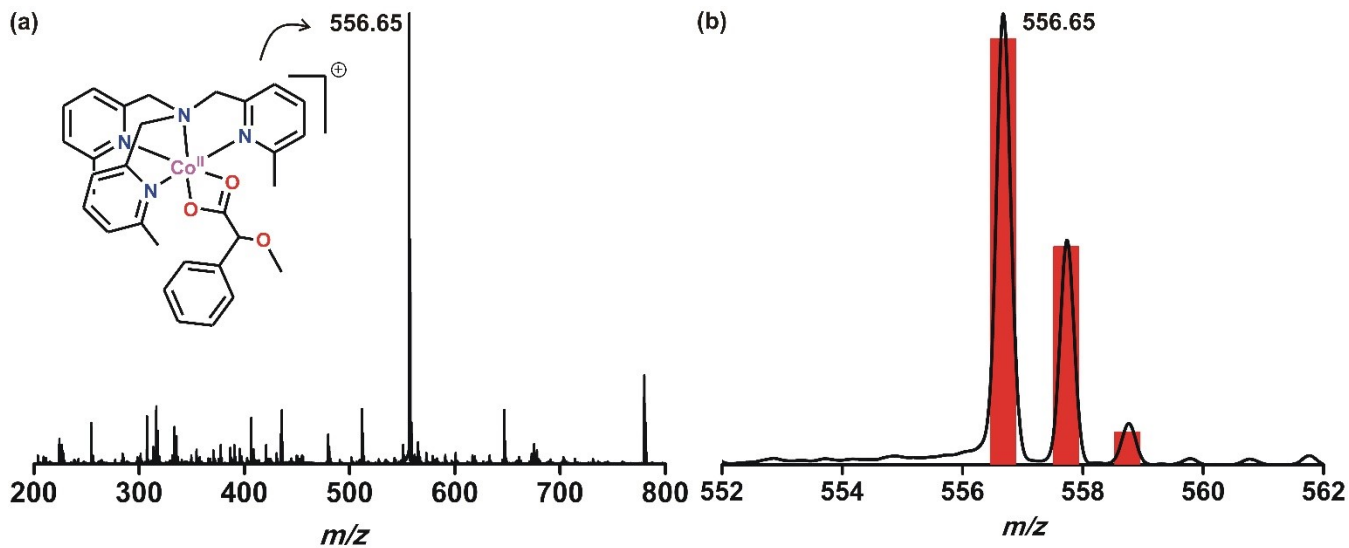

**Fig. S9.** (a) ESI-mass spectrum of  $[(6\text{-Me}_3\text{-TPA})\text{Co}^{\text{II}}(\text{MPA})](\text{BPh}_4)$  (**4**). (b) Isotope distribution pattern of the ion peak at  $m/z$  556.65. The solid red bars indicate the calculated isotope distribution pattern.

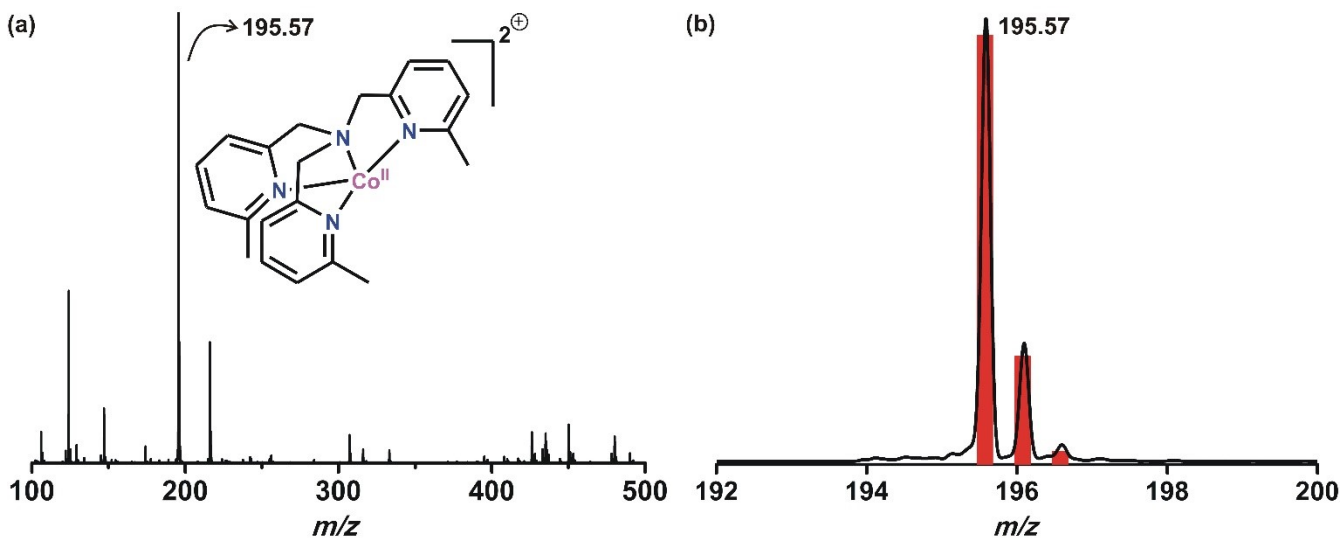

**Fig. S10.** (a) ESI-mass spectrum of  $[(6\text{-Me}_3\text{-TPA})\text{Co}^{\text{II}}(\text{CH}_3\text{CN})_2](\text{ClO}_4)_2$  (**5**). (b) Isotope distribution pattern of the ion peak at  $m/z$  195.57. The solid red bars indicate the calculated isotope distribution pattern.

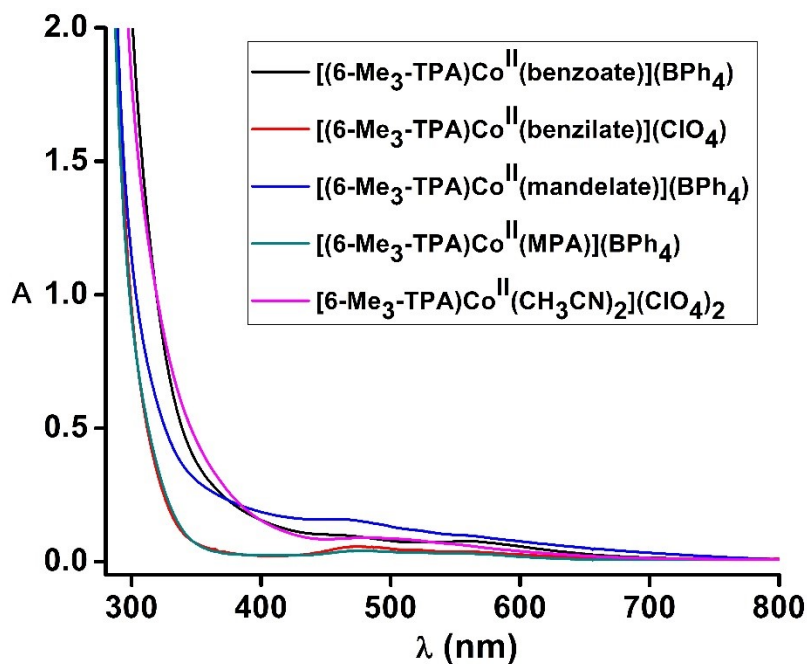

**Fig. S11.** Optical spectra of the cobalt(II) complexes (1 mM in CH<sub>3</sub>CN) at 298 K.

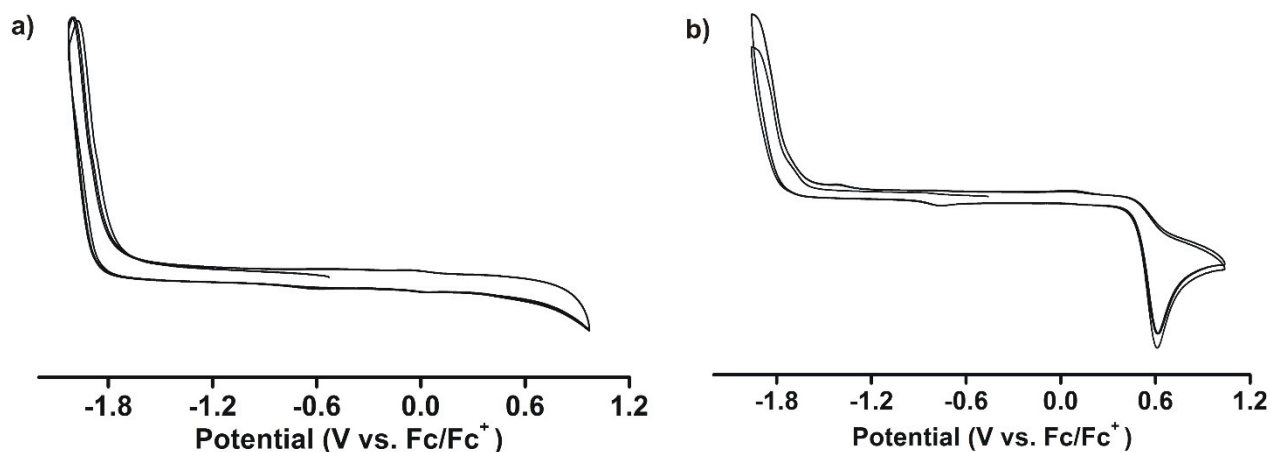

**Fig. S12.** Cyclic voltammogram (CV) of (a) [(6-Me<sub>3</sub>-TPA)Co<sup>II</sup>(benzoate)](BPh<sub>4</sub>) (**1**) and (b) [(TPA)Co<sup>II</sup>(benzoate)](BPh<sub>4</sub>)<sup>1</sup> has been recorded at a glassy carbon working electrode and Ag/AgCl reference electrode in acetonitrile solutions containing 0.1 M <sup>n</sup>Bu<sub>4</sub>NPF<sub>6</sub> as supporting electrolyte.

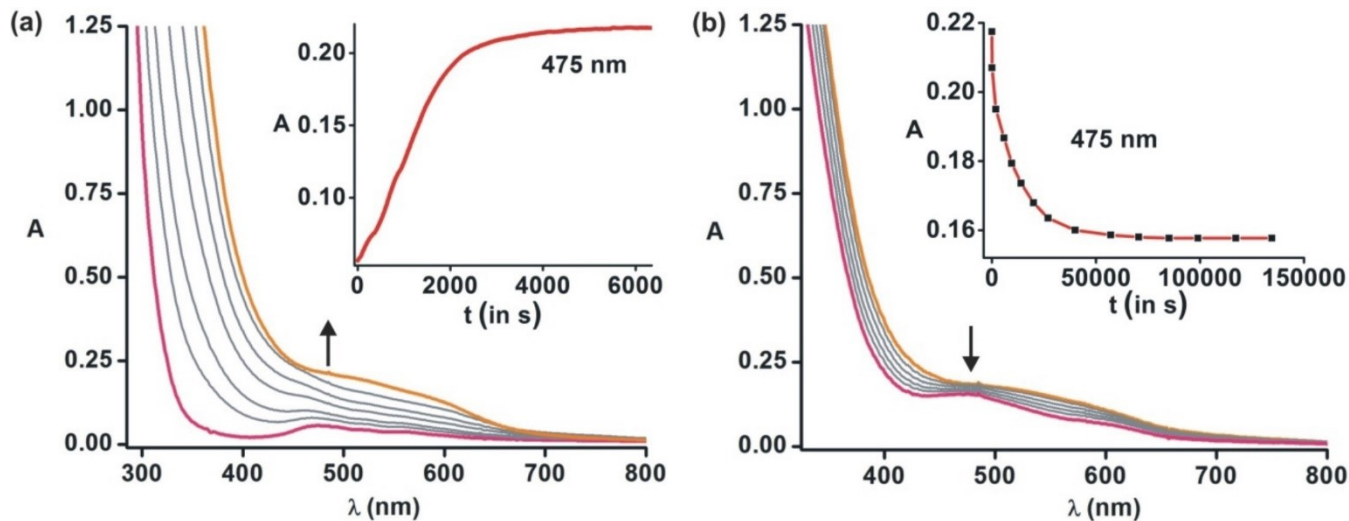

**Fig. S13.** Time-dependent optical spectra of complex **2** (1 mM in acetonitrile) during the reaction with 10 equiv of aqueous hydrogen peroxide (30%). (a) Formation and (b) decay of the intermediate species. Insets: Absorbance vs time plot for the band at 475 nm.

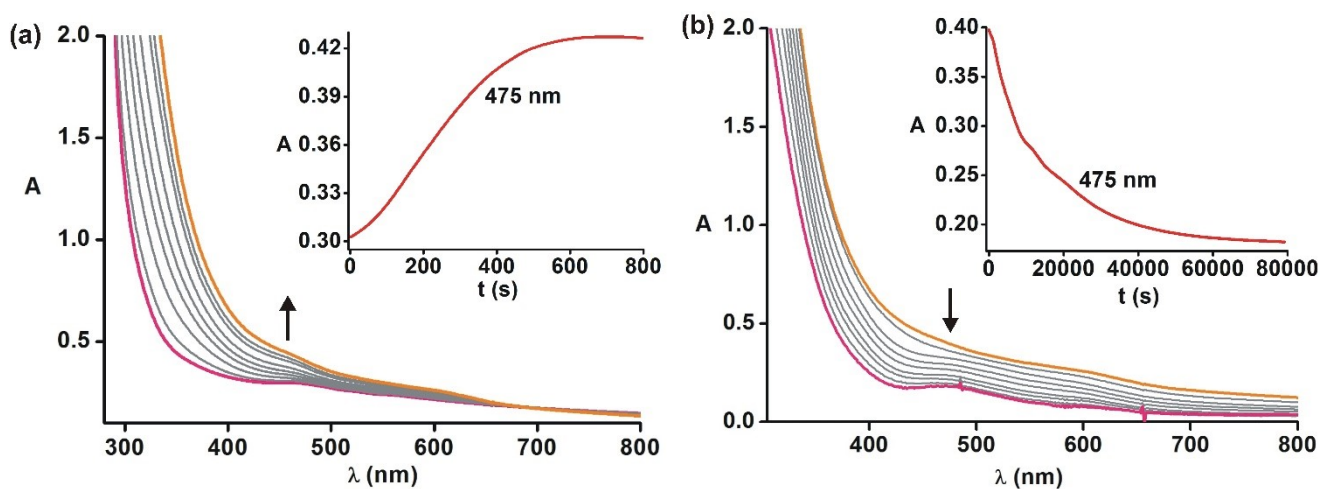

**Fig. S14.** Time-dependent optical spectra of complex **3** (1 mM in acetonitrile) during the reaction with 10 equiv of aqueous hydrogen peroxide (30%). (a) Formation and (b) decay of the intermediate species. Insets: Absorbance vs time plot for the band at 475 nm.

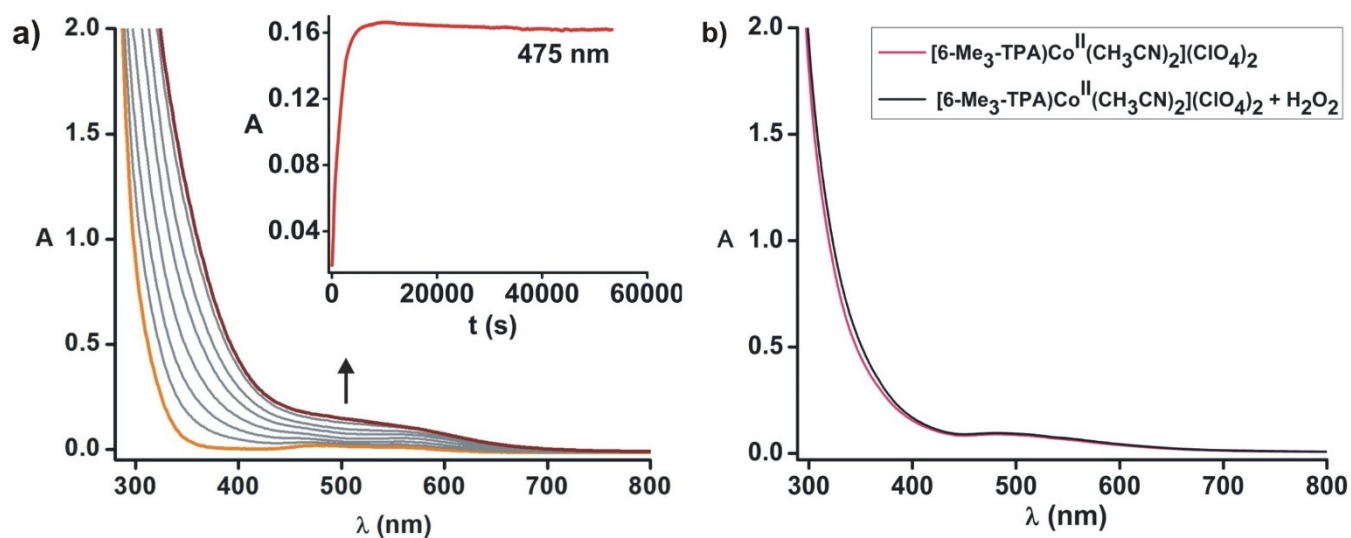

**Fig. S15.** Change in optical spectra of complexes (a) **4** and (c) **5** (1 mM in acetonitrile) during the reaction with 10 equiv of aqueous hydrogen peroxide (30%).

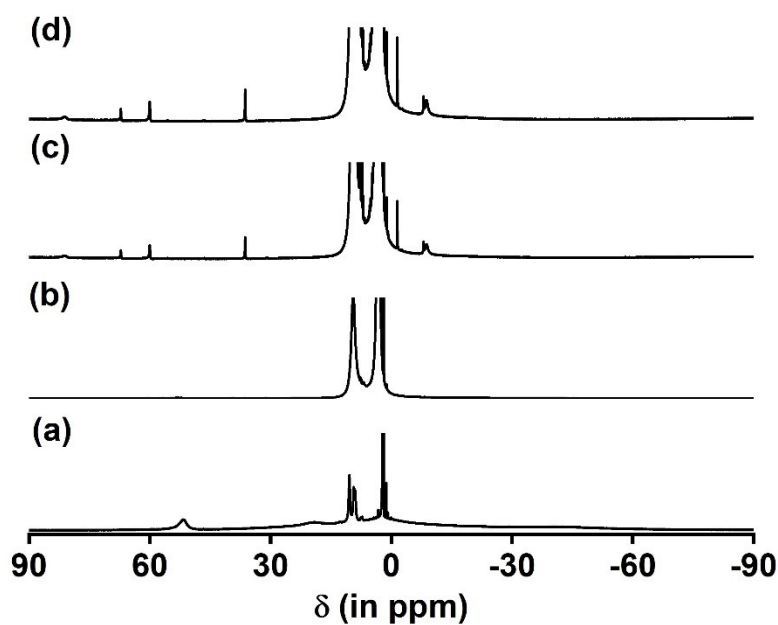

**Fig. S16.** Time-dependent <sup>1</sup>H NMR spectra (400 MHz, at 298 K) during the reaction of complex **2** (in CD<sub>3</sub>CN) with 10 equiv H<sub>2</sub>O<sub>2</sub> (30% aqueous solution). Spectra were recorded with different time interval; (a) as prepared cobalt(II) complex, (b) immediately after addition of H<sub>2</sub>O<sub>2</sub> to the solution, (c) the same solution after 2 h (d) and after 20 h.



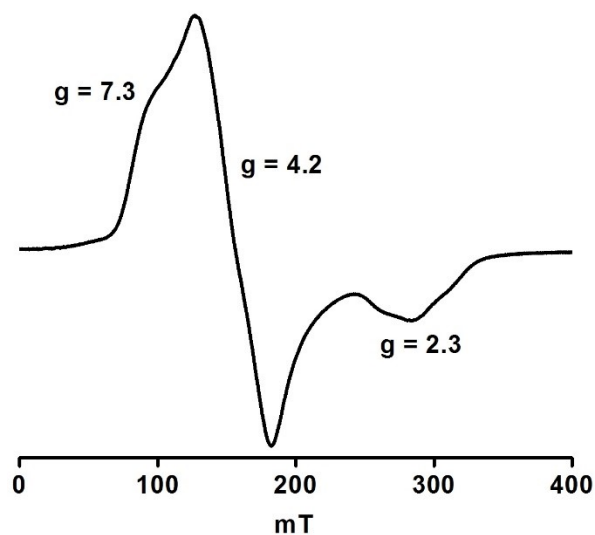

**Fig. S17.** X-band EPR spectrum of complex **2**. Experimental conditions for EPR: temperature = 12 K, microwave frequency = 9.12 GHz, microwave power = 0.998 mW, modulation amplitude = 100 kHz, modulation width = 1.2 mT, time constant = 0.03 s.

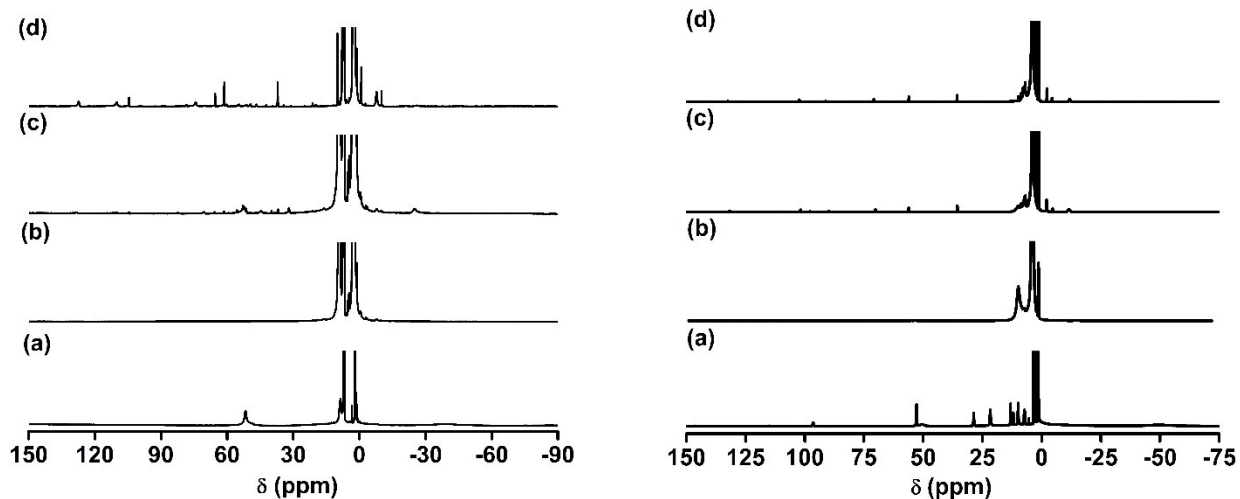

**Fig. S18.** Time-dependent  $^1\text{H}$  NMR spectra (400 MHz, at 298 K) during the reaction of complexes **3** (left) and **4** (right) (in  $\text{CD}_3\text{CN}$ ) with 10 equiv  $\text{H}_2\text{O}_2$  (30% aqueous solution). Spectra were recorded with different time interval; (a) as prepared cobalt(II) complex, (b) after addition of  $\text{H}_2\text{O}_2$  to the solution, (c) the same solution after 2 h (d) and after 20 h.

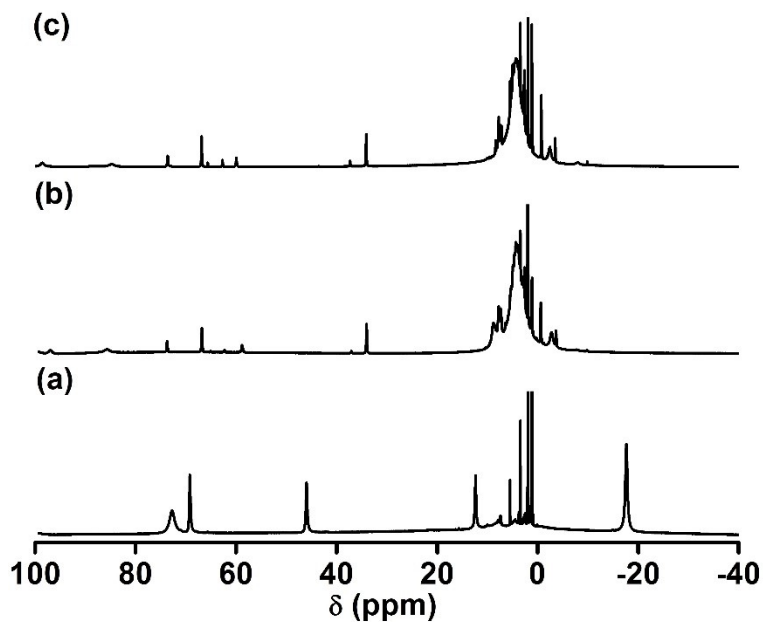

**Fig. S19.** Time-dependent  $^1\text{H}$  NMR spectra (400 MHz, at 298 K) during the reaction of complex **5** (in  $\text{CD}_3\text{CN}$ ) with 10 equiv  $\text{H}_2\text{O}_2$  (30% aqueous solution). Spectra were recorded with different time interval; (a) as prepared cobalt(II) complex, (b) after addition of  $\text{H}_2\text{O}_2$  to the solution, (c) the same solution after 20 h.

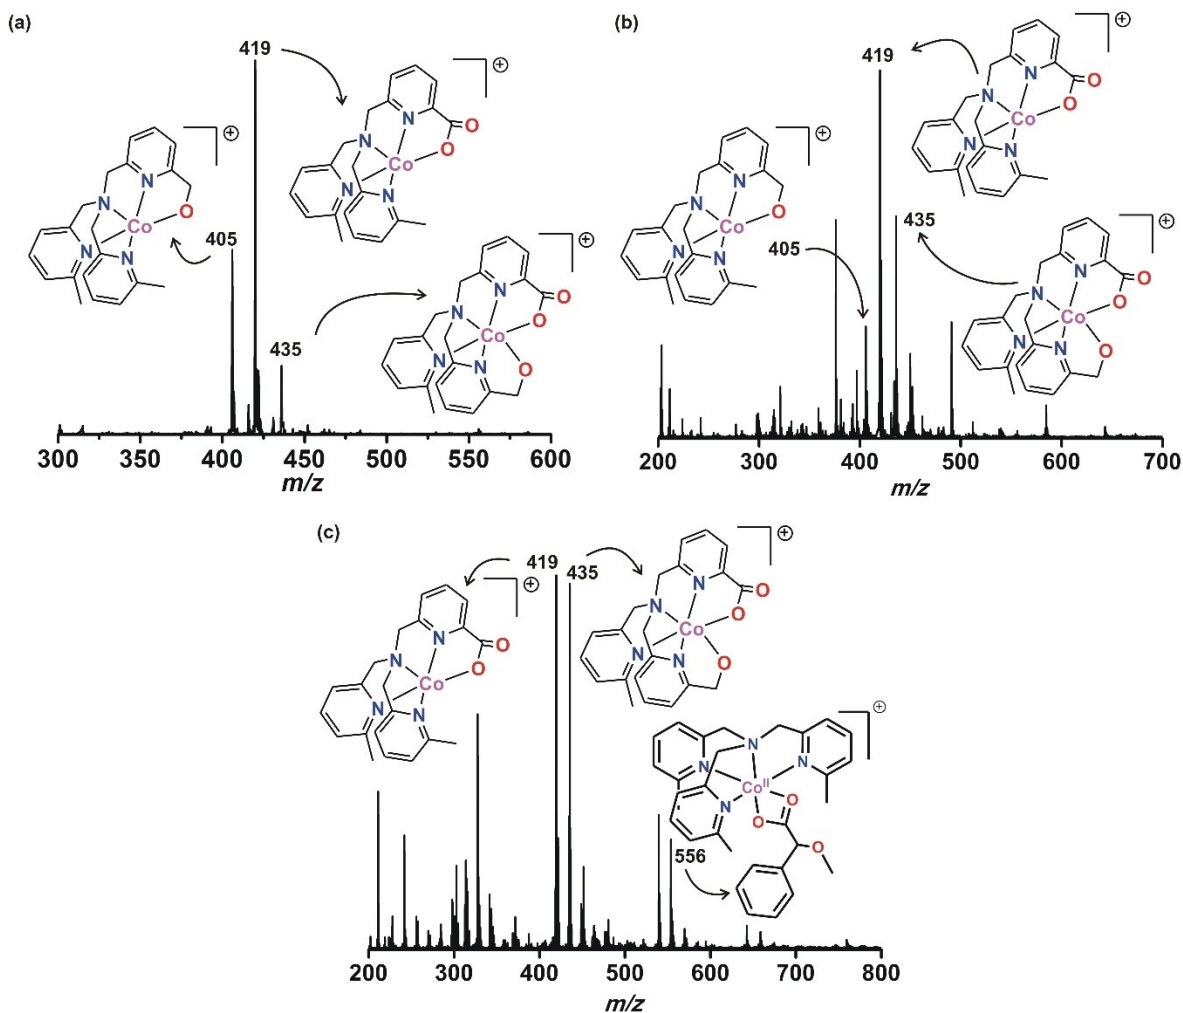

**Fig. S20.** ESI-mass spectra of the oxidized solutions after the reaction of (a) **2**, (b) **3** and (c) **4** with H<sub>2</sub>O<sub>2</sub> for 20 h.

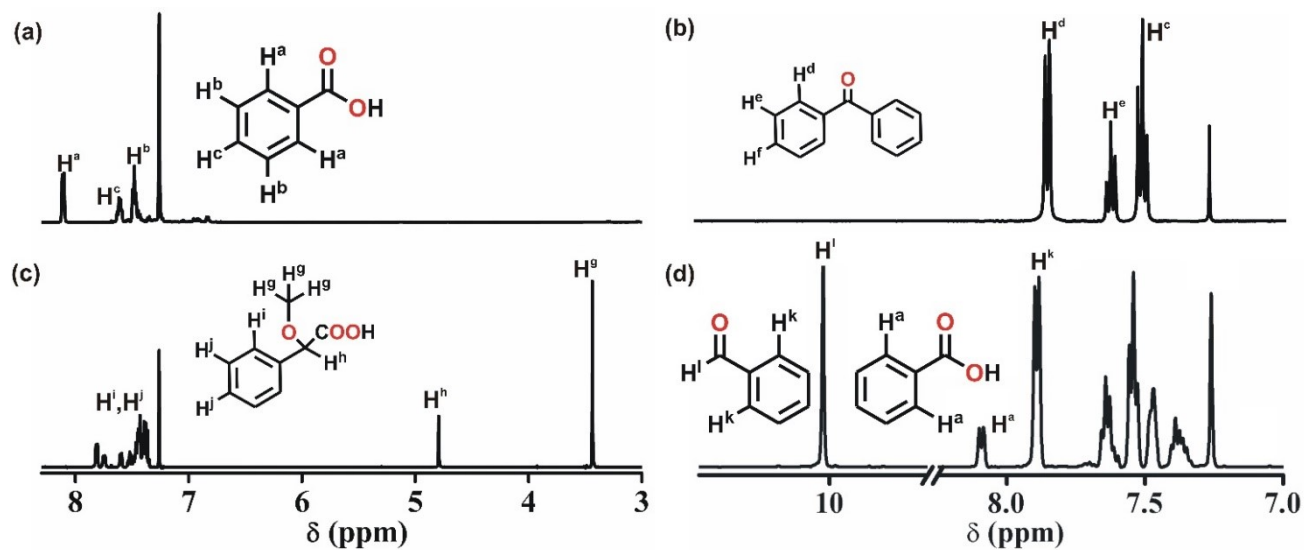

**Fig. S21.** <sup>1</sup>H NMR spectra of organic products obtained from the oxidized solution of (a) **1**, (b) **2**, (c) **3** and (d) **4** after the reaction with 10 equiv of H<sub>2</sub>O<sub>2</sub> for 20 h.

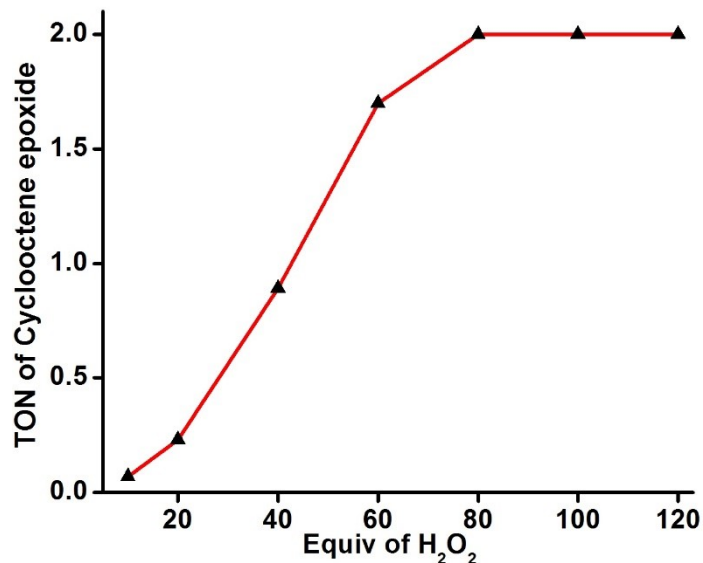

**Fig. S22.** TON in the oxidation of cyclooctene by complex **2** with different equivalents of H<sub>2</sub>O<sub>2</sub>. Experimental conditions: 0.01 mmol complex **2**, 100 equiv of substrate in acetonitrile at room temperature. Reaction time: 20 h. Turnover number TON (cyclooctene epoxide) = mol of product/mol of catalyst.

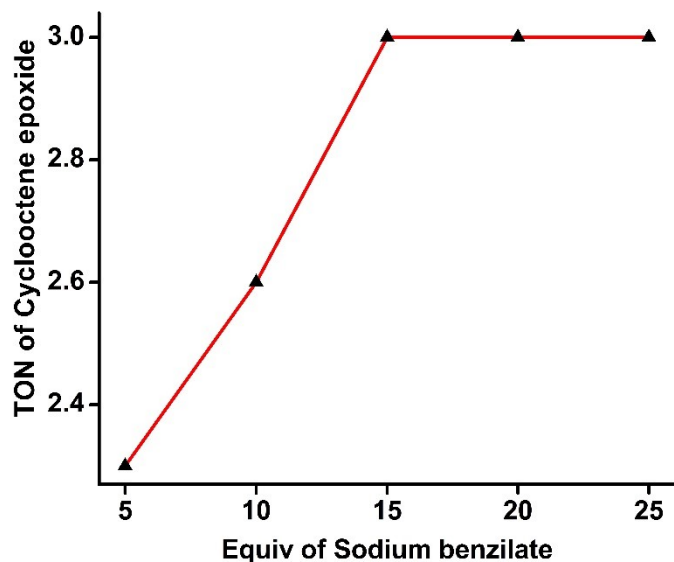

**Fig. S23.** TON in the oxidation of cyclooctene by complex **2** with different equivalents of sodium benzoate. Experimental conditions: 0.01 mmol complex **2**, 100 equiv of H<sub>2</sub>O<sub>2</sub>, 100 equiv of substrate in acetonitrile at room temperature. Reaction time: 20 h. Turnover number TON (cyclooctene epoxide) = mol of product/mol of catalyst.

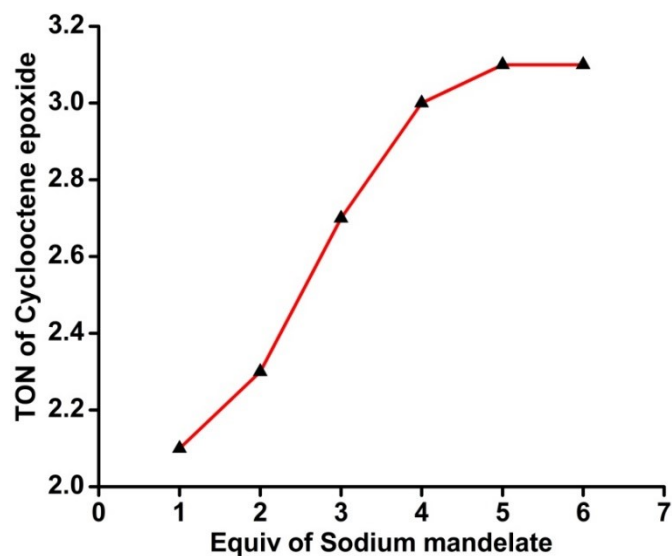

**Fig. S24.** TON in the oxidation of cyclooctene by complex **3** with different equivalents of sodium mandelate. Experimental conditions: 0.01 mmol complex **3**, 100 equiv of H<sub>2</sub>O<sub>2</sub>, 100 equiv of substrate in acetonitrile at room temperature. Reaction time: 20 h. Turnover number TON (cyclooctene epoxide) = mol of product/mol of catalyst.

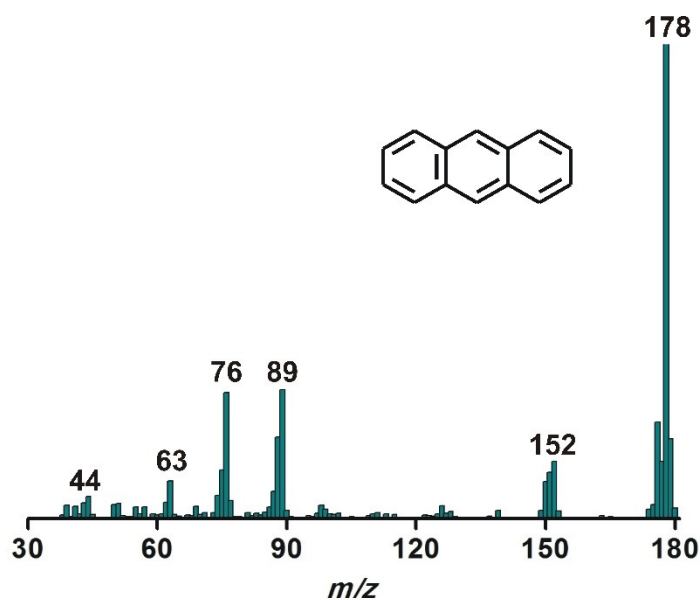

**Fig. S25.** GC-mass spectrum of anthracene formed from 9,10-dihydroanthracene in the catalytic oxidation by complex **1**.

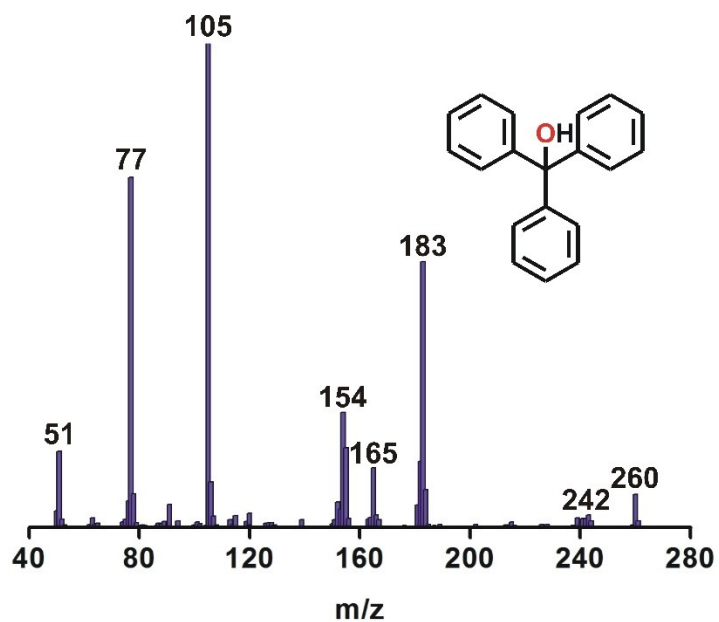

**Fig. S26.** GC-mass spectrum of triphenylmethanol formed from triphenylmethane in the catalytic oxidation by complex **1**.

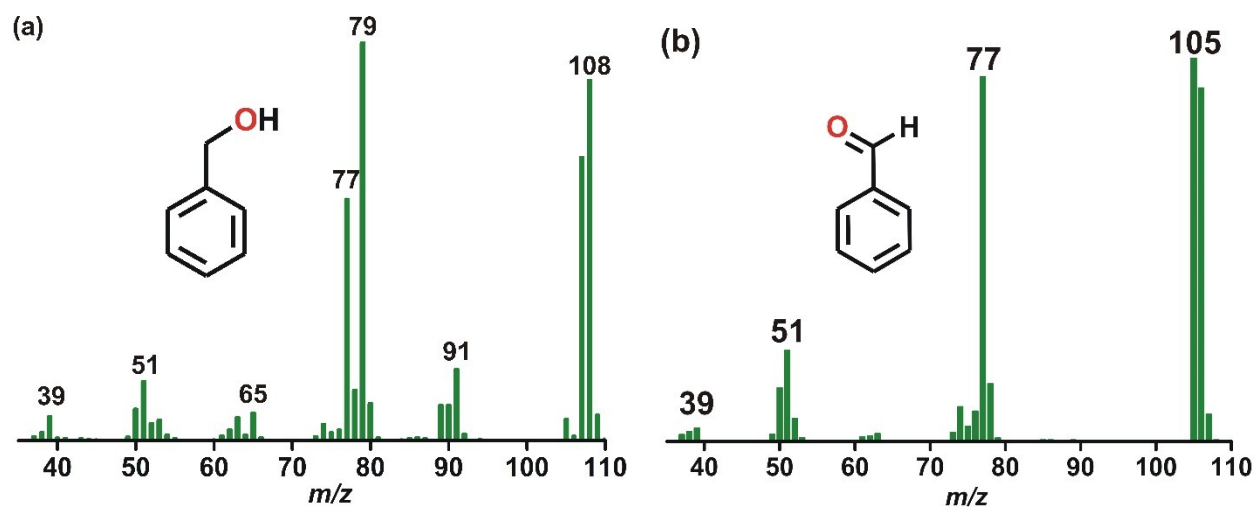

**Fig. S27.** GC-mass spectra of (a) benzyl alcohol and (b) benzaldehyde formed from toluene in the catalytic oxidation by complex **1**.

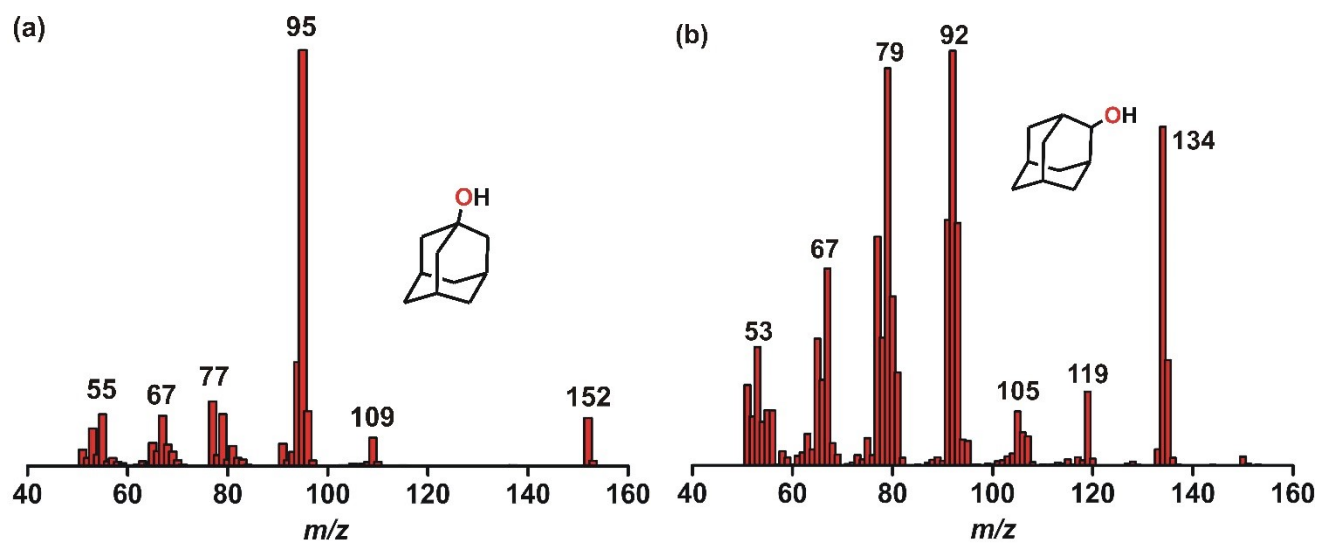

**Fig. S28.** GC-mass spectra of (a) 1-adamantanol and (b) 2-adamantanol formed from adamantane in the catalytic oxidation by complex 1.

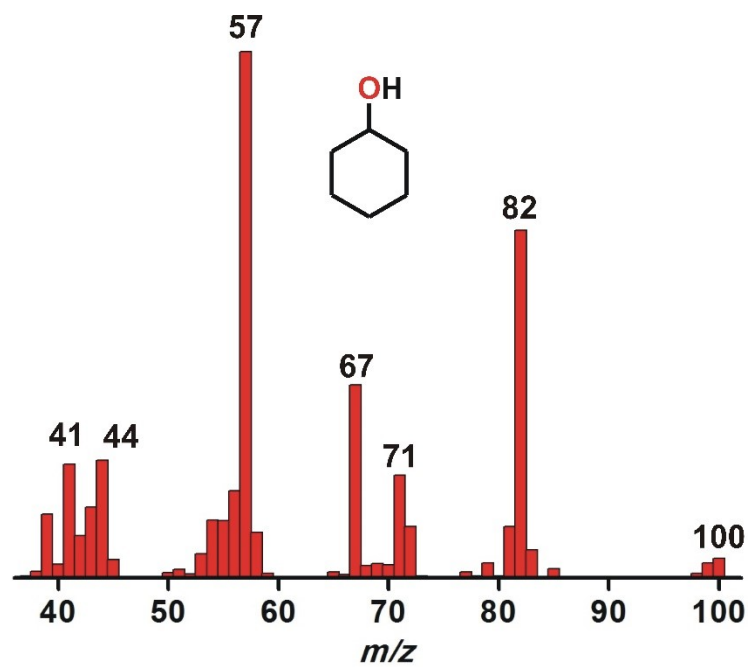

**Fig. S29.** GC-mass spectrum of cyclohexanol formed from cyclohexane in the catalytic oxidation by complex 1.

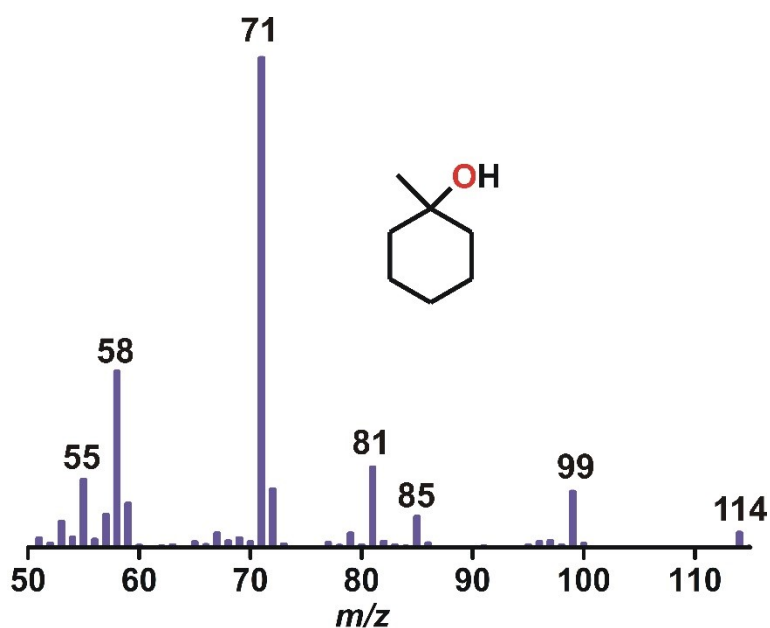

**Fig. S30.** GC-mass spectrum of 3° methylcyclohexanol formed from methylcyclohexane in the catalytic oxidation by complex **1**.

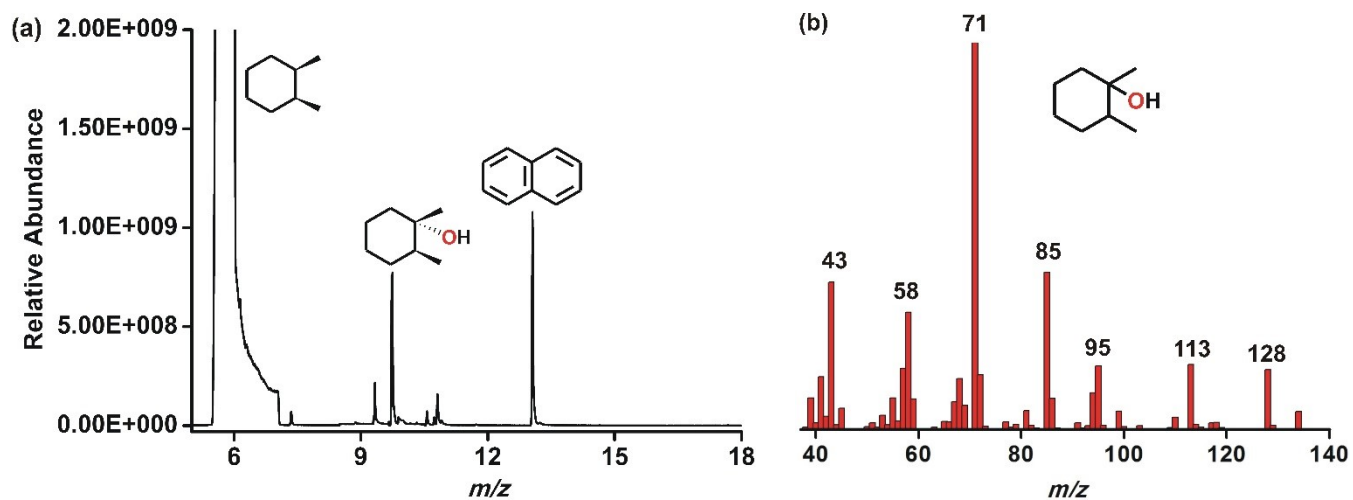

**Fig. S31.** (a) Chromatogram and (b) GC-mass spectrum of 1,2-dimethylcyclohexanol formed from *cis*-1,2-dimethylcyclohexane in the catalytic oxidation by complex **1**.



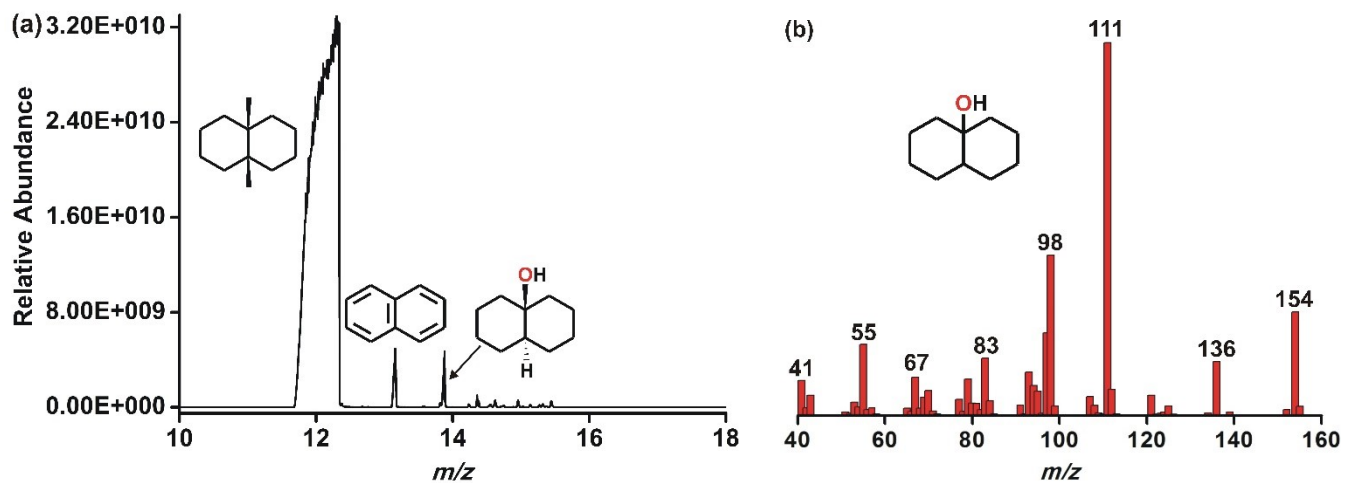

**Fig. S32.** (a) Chromatogram and (b) GC-mass spectrum of 4-decalol formed from *cis*-decalin in the catalytic oxidation by complex **1**.

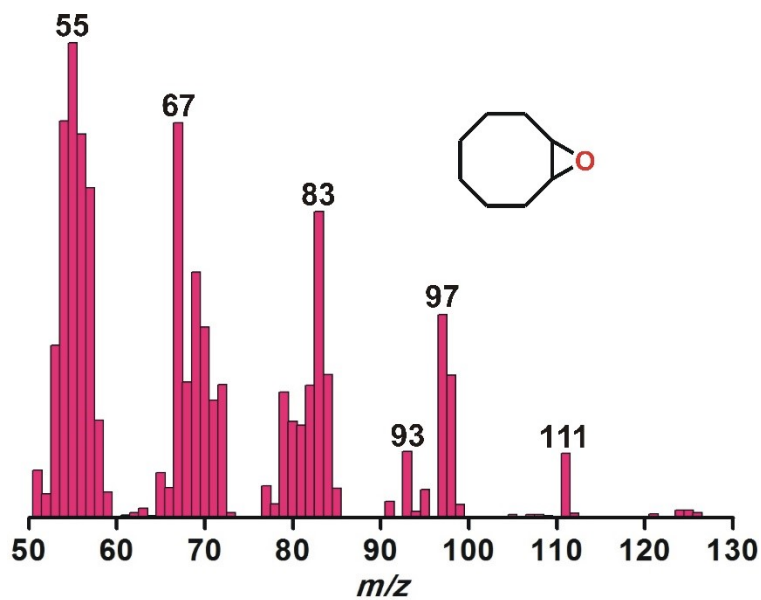

**Fig. S33.** GC-mass spectrum of cyclooctene epoxide formed from cyclooctene in the catalytic oxidation by complex **1**.

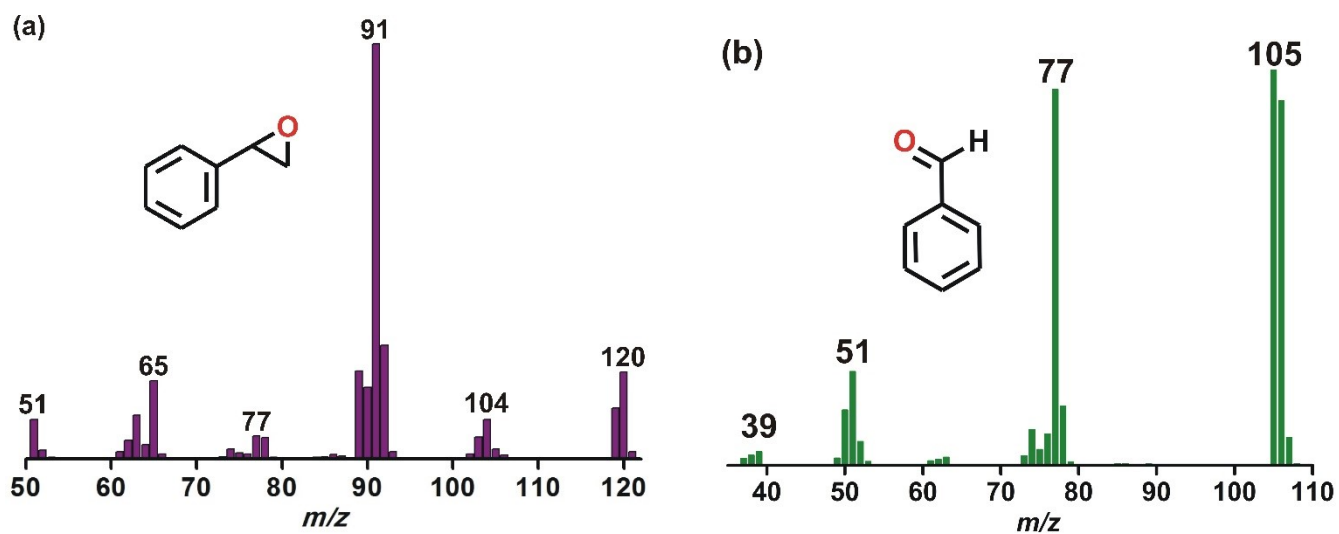

**Fig. S34.** GC-mass spectra of (a) styrene epoxide and (b) benzaldehyde formed from styrene in the catalytic oxidation by complex 1.

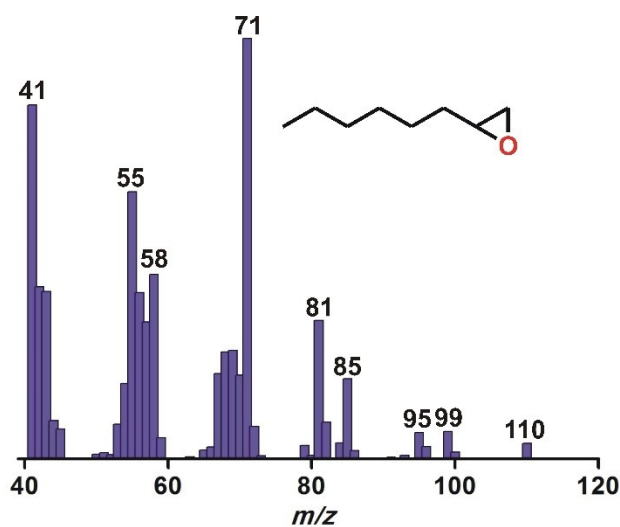

**Fig. S35.** GC-mass spectrum of 1-octene epoxide formed from 1-octene in the catalytic oxidation by complex 1.

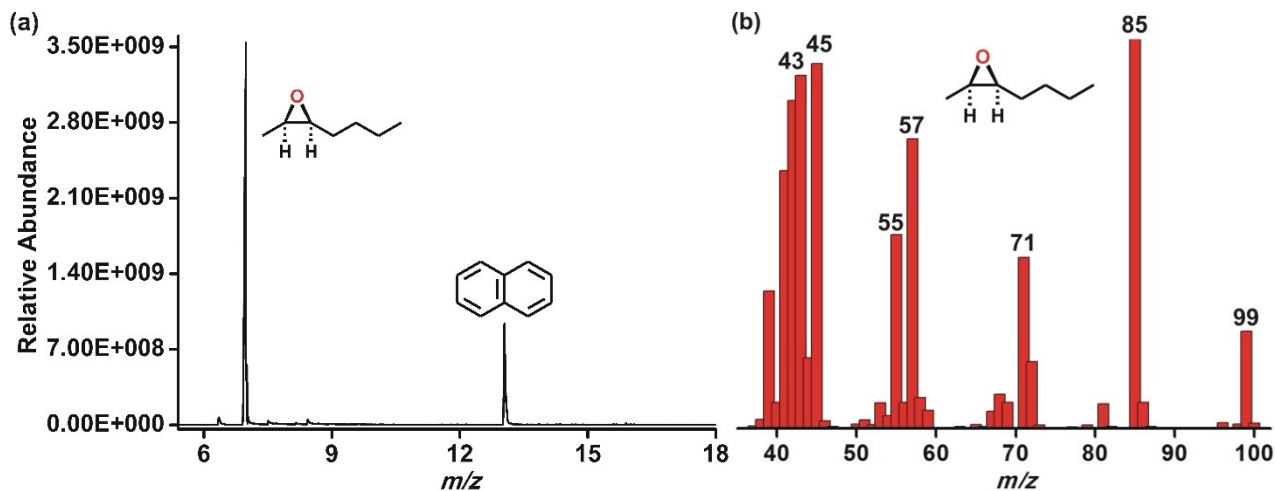

**Fig. S36.** (a) Chromatogram and (b) GC-mass spectrum of *cis*-2-heptene epoxide formed from *cis*-2-heptene in the catalytic reaction by complex 1.

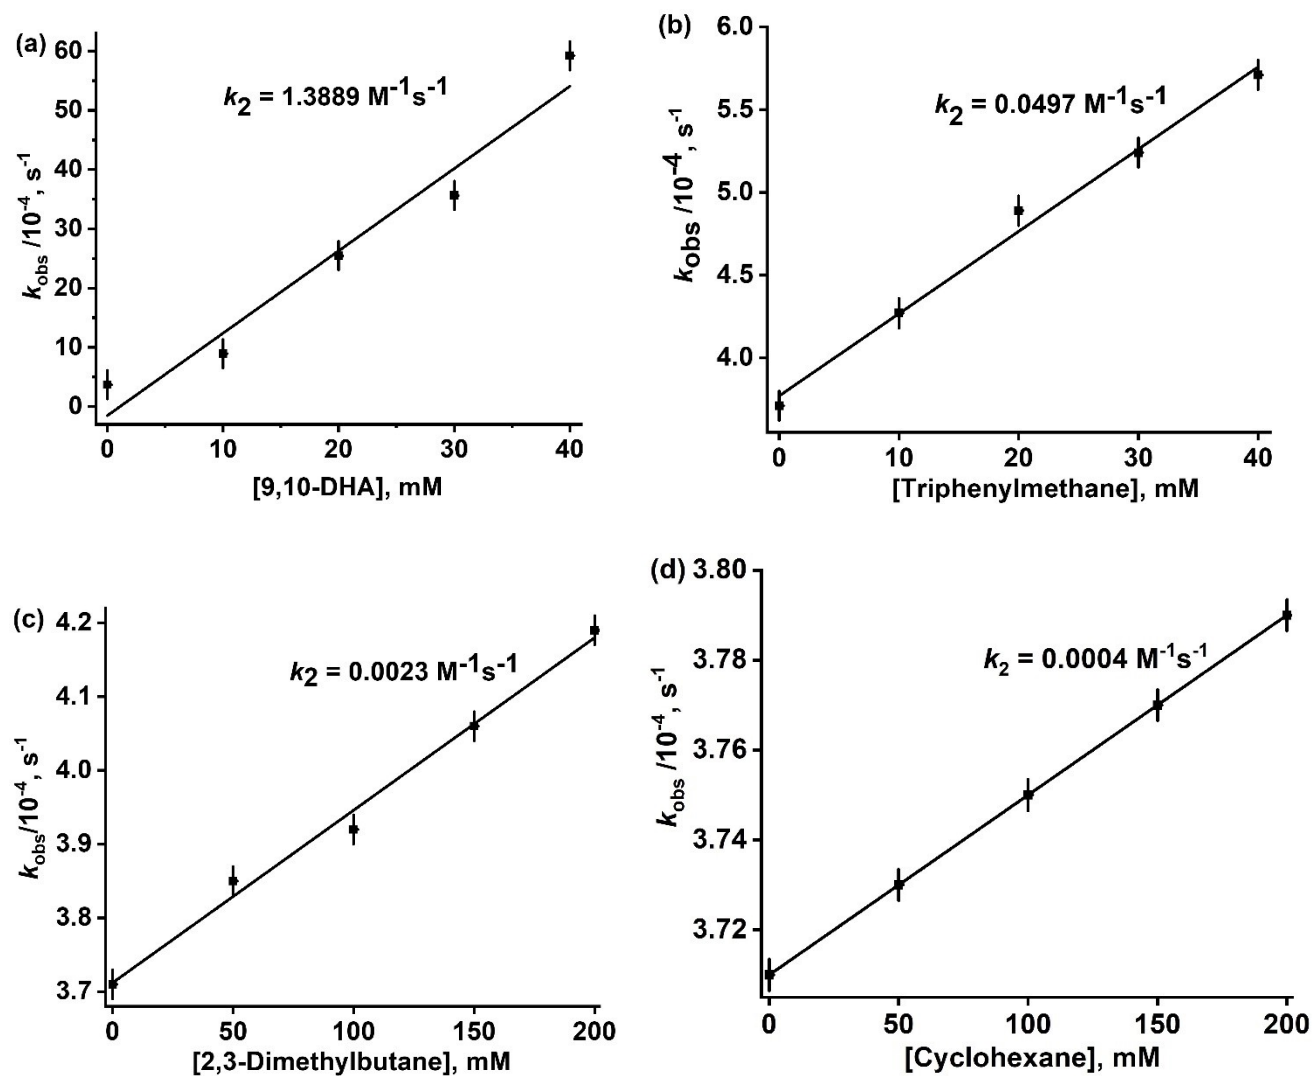

**Fig. S37.** Plots of  $k_{\text{obs}}$  vs substrate concentration for the reaction of complex 2 with  $\text{H}_2\text{O}_2$  (10 equiv) in the presence (a) 9,10-dihydroanthracene, (b) triphenylmethane, (c) 2,3-dimethylbutane and (d) cyclohexane at 298 K.

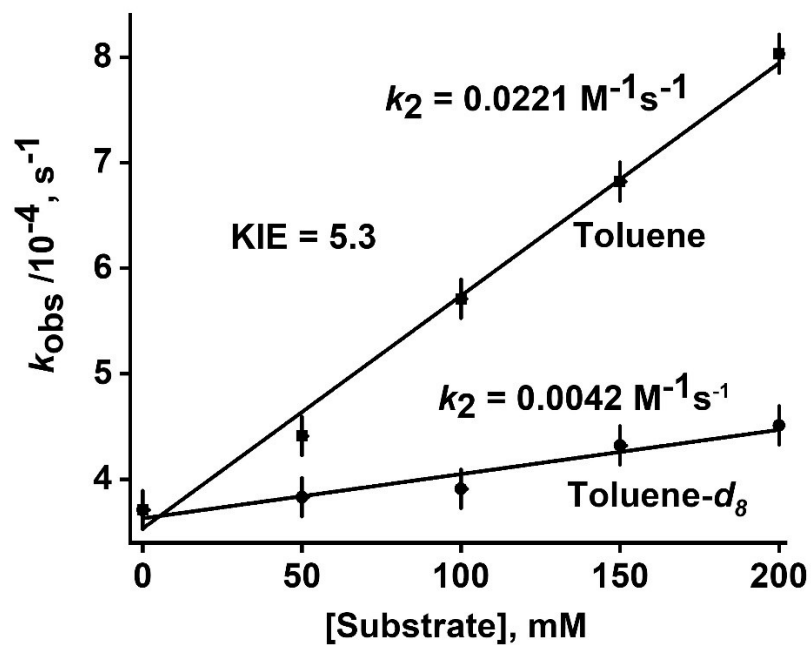

**Fig. S38.** Kinetic isotope effect value obtained from separate reactions of complex **2** with toluene and toluene- $d_8$  at 298 K.

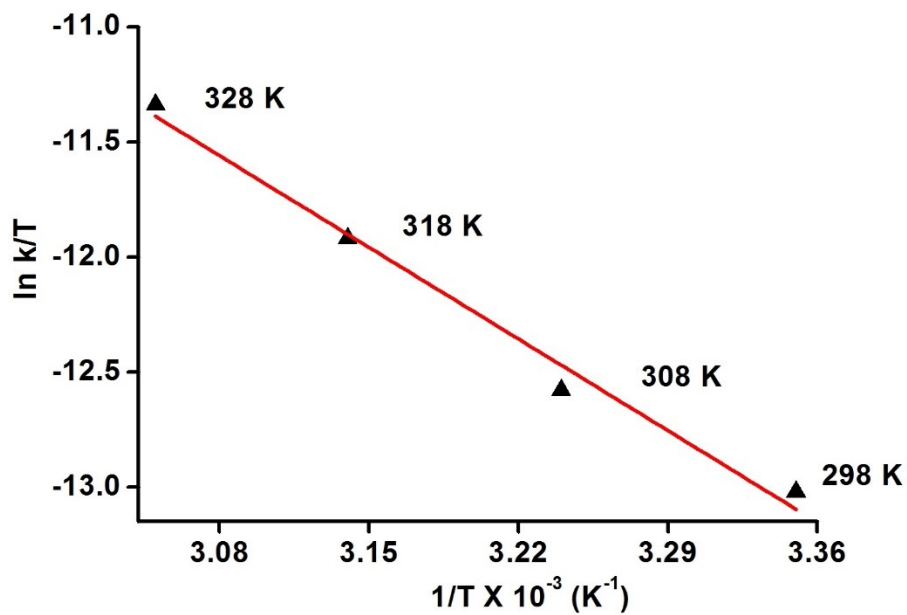

**Fig. S39.** Eyring plot for the reaction of complex **2** with 10 equiv  $H_2O_2$ .

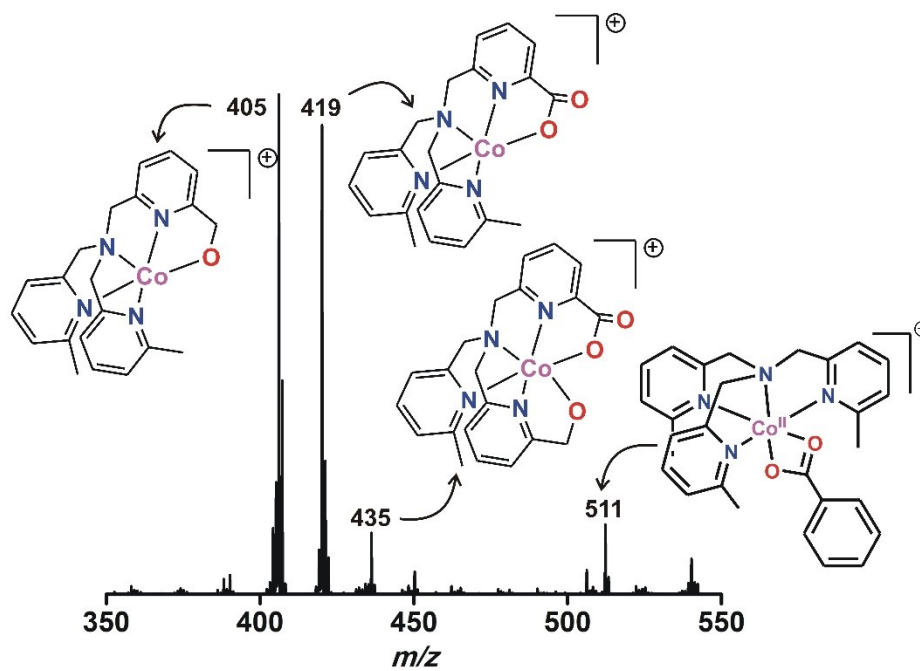

**Fig. S40.** ESI-mass spectrum of the oxidized solution after the reaction of complex **5** with  $\text{H}_2\text{O}_2$  in the presence of 1 equiv of sodium benzoate after 20 h.

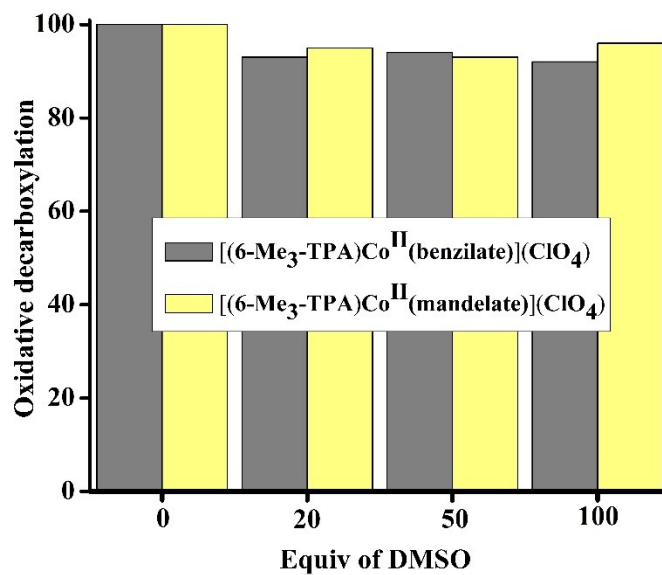

**Fig. S41.** Oxidative decarboxylation of complexes **2** and **3** in the presence of radical scavenger DMSO.

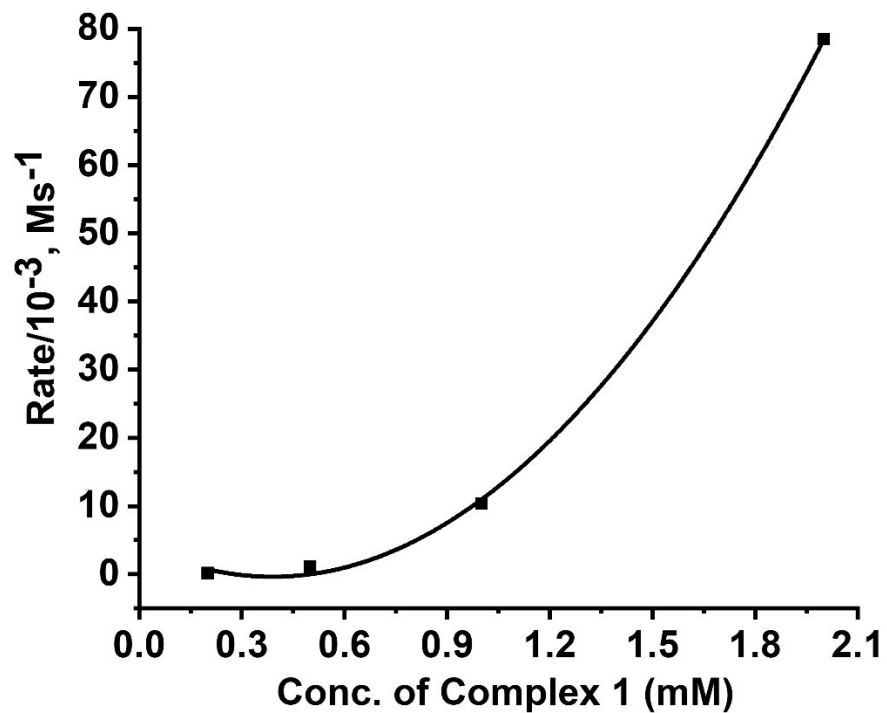

**Fig. S42.** Concentration dependence of the initial rate for the reaction of complex 1 with H<sub>2</sub>O<sub>2</sub>.

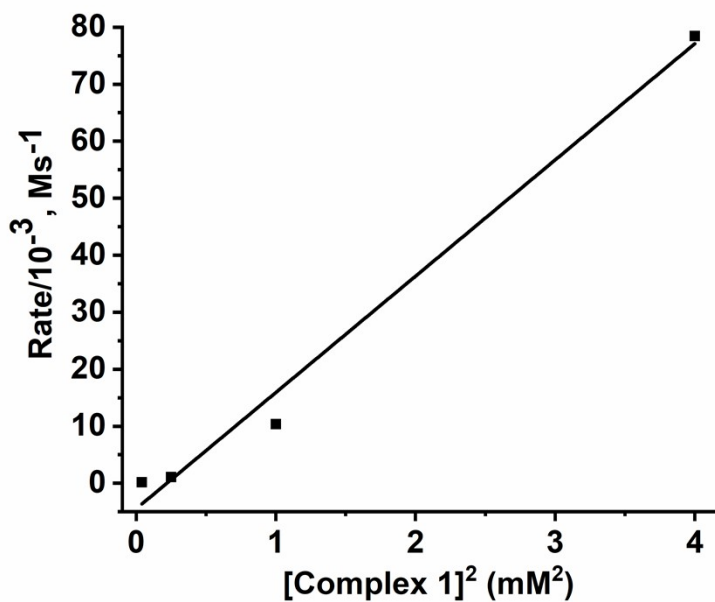

**Fig. S43.** Second order dependence of rate on the concentration of complex 1 for its reaction with H<sub>2</sub>O<sub>2</sub>.

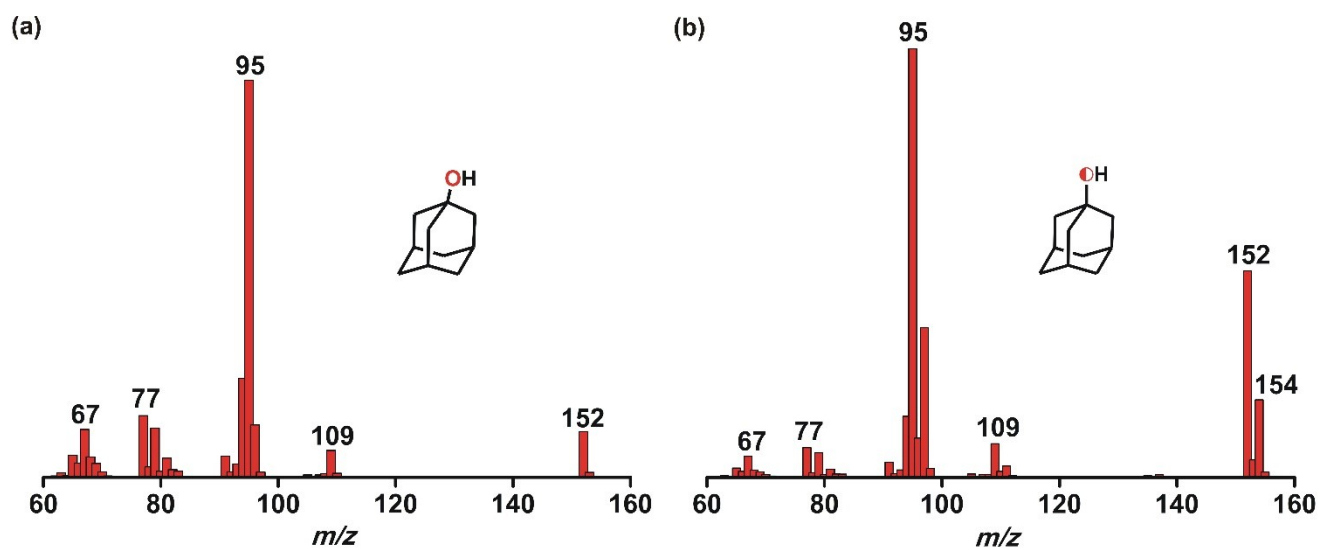

**Fig. S44.** GC-mass spectra of 1-adamantanol formed in the reaction of complex **1** with adamantane under catalytic conditions (a) in the absence of  $\text{H}_2^{18}\text{O}$  (b) in the presence of  $\text{H}_2^{18}\text{O}$ .

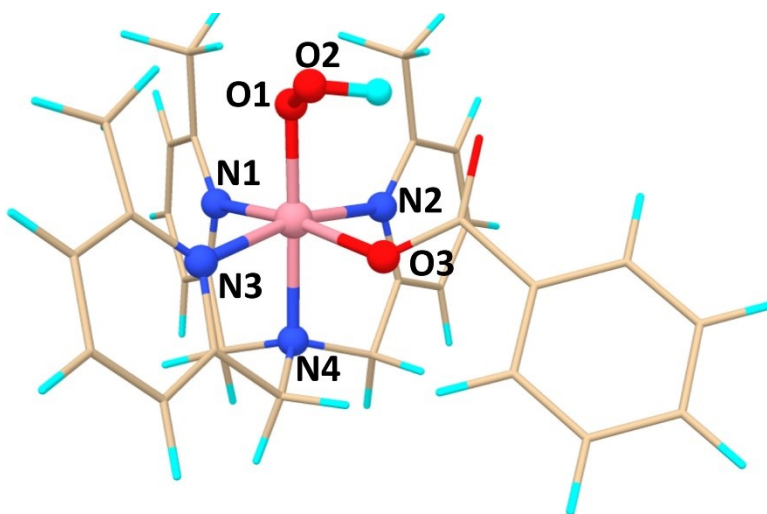

**Fig. S45.** Optimized structures of the monomeric analogue of the intermediate **Co-O2H**.

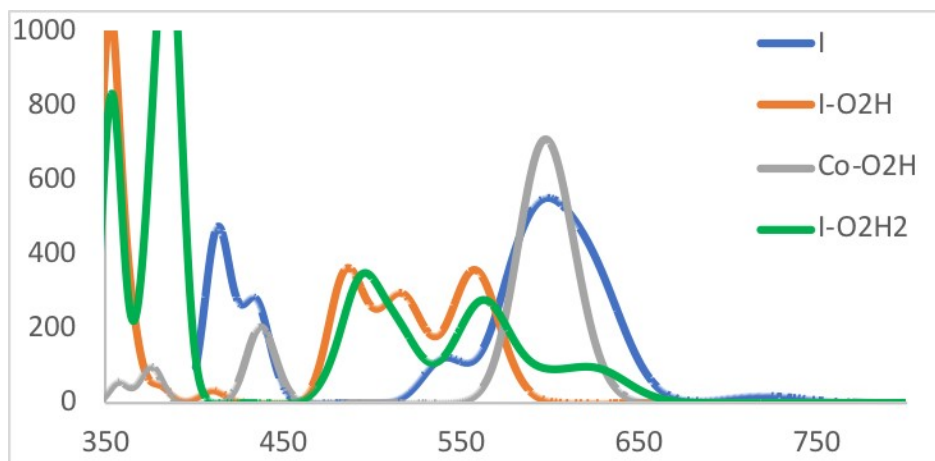

**Fig. S46.** Absorption spectra of the optimized intermediates simulated through TDDFT.

***Cartesian coordinates for the optimized structure of I:***

| Atom  | Coordinates (Angstroms) |             |              |
|-------|-------------------------|-------------|--------------|
|       | X                       | Y           | Z            |
| ----- |                         |             |              |
| Co    | -1.472482000            | 1.712785000 | 0.051292000  |
| O     | 0.162926000             | 1.114618000 | 0.681248000  |
| N     | -1.423242000            | 3.561781000 | 0.823384000  |
| N     | -3.302855000            | 2.136029000 | -0.599221000 |
| N     | -2.506552000            | 0.921869000 | 1.564898000  |
| N     | -0.858975000            | 2.534261000 | -1.680976000 |
| C     | 0.813845000             | 3.677336000 | 1.982761000  |
| H     | 0.939612000             | 2.627894000 | 1.731215000  |
| H     | 0.716649000             | 3.773021000 | 3.072059000  |
| H     | 1.703284000             | 4.241869000 | 1.687068000  |
| C     | -0.402963000            | 4.289643000 | 1.350822000  |
| C     | -0.485878000            | 5.693207000 | 1.393846000  |
| H     | 0.361538000             | 6.238146000 | 1.801998000  |



|   |              |              |              |
|---|--------------|--------------|--------------|
| C | -1.609272000 | 6.364667000  | 0.935919000  |
| C | -2.684194000 | 5.600715000  | 0.478635000  |
| H | -3.612851000 | 6.056678000  | 0.146184000  |
| C | -2.559877000 | 4.219164000  | 0.453961000  |
| C | -3.735150000 | 3.360489000  | 0.116018000  |
| H | -4.197618000 | 3.049001000  | 1.060597000  |
| H | -4.488422000 | 3.907104000  | -0.460044000 |
| C | -4.162972000 | 0.988997000  | -0.207334000 |
| H | -4.019666000 | 0.181918000  | -0.928121000 |
| H | -5.220591000 | 1.279895000  | -0.220075000 |
| C | -3.750359000 | 0.549439000  | 1.162067000  |
| C | -4.619766000 | -0.172130000 | 1.972562000  |
| H | -5.601639000 | -0.441410000 | 1.592152000  |
| C | -4.208717000 | -0.515970000 | 3.259101000  |
| H | -4.853334000 | -1.095022000 | 3.916042000  |
| C | -2.969859000 | -0.059994000 | 3.696568000  |
| H | -2.627830000 | -0.257698000 | 4.708632000  |
| C | -2.134369000 | 0.679815000  | 2.847799000  |
| C | -0.872298000 | 1.256650000  | 3.398458000  |
| H | -0.999731000 | 2.338405000  | 3.520773000  |
| H | -0.027902000 | 1.082519000  | 2.732505000  |
| H | -0.665957000 | 0.825559000  | 4.380503000  |
| C | -3.267032000 | 2.296144000  | -2.073289000 |
| H | -3.931701000 | 3.111794000  | -2.380801000 |
| H | -3.650071000 | 1.378933000  | -2.528279000 |
| C | -1.878520000 | 2.559640000  | -2.572612000 |
| C | -1.687912000 | 2.814508000  | -3.929158000 |

|    |              |              |              |
|----|--------------|--------------|--------------|
| H  | -2.546023000 | 2.815815000  | -4.596872000 |
| C  | -0.395792000 | 3.046272000  | -4.393915000 |
| H  | -0.203206000 | 3.211618000  | -5.451427000 |
| C  | 0.635027000  | 3.105430000  | -3.461731000 |
| H  | 1.650539000  | 3.346050000  | -3.765648000 |
| C  | 0.383469000  | 2.892058000  | -2.099797000 |
| Co | 1.227056000  | -1.312186000 | -0.070210000 |
| O  | -0.442417000 | -1.742709000 | -0.912268000 |
| O  | -1.746895000 | 0.135333000  | -1.006749000 |
| N  | 2.003429000  | -3.480060000 | 0.329184000  |
| N  | 3.006171000  | -0.837820000 | 0.657841000  |
| N  | 2.256920000  | -1.072865000 | -1.828525000 |
| N  | 0.689696000  | -1.499998000 | 1.910594000  |
| C  | 0.136357000  | -4.890207000 | -0.424888000 |
| H  | -0.268485000 | -3.949095000 | -0.798027000 |
| H  | 0.405322000  | -5.515047000 | -1.287328000 |
| H  | -0.630582000 | -5.428166000 | 0.142089000  |
| C  | 1.357469000  | -4.658011000 | 0.414720000  |
| C  | 1.853894000  | -5.684037000 | 1.237639000  |
| H  | 1.307201000  | -6.622068000 | 1.297442000  |
| C  | 3.024634000  | -5.489486000 | 1.962736000  |
| C  | 3.709926000  | -4.277770000 | 1.823945000  |
| H  | 4.642210000  | -4.086935000 | 2.349116000  |
| C  | 3.169373000  | -3.305938000 | 0.988719000  |
| C  | 3.905278000  | -2.035066000 | 0.678831000  |
| H  | 4.330437000  | -2.132304000 | -0.326746000 |
| H  | 4.726615000  | -1.859734000 | 1.380912000  |

|   |              |              |              |
|---|--------------|--------------|--------------|
| C | 3.590176000  | 0.195112000  | -0.245266000 |
| H | 3.134401000  | 1.156828000  | -0.004315000 |
| H | 4.672386000  | 0.268895000  | -0.086187000 |
| C | 3.273278000  | -0.186918000 | -1.661174000 |
| C | 3.993551000  | 0.329252000  | -2.732082000 |
| H | 4.802807000  | 1.030623000  | -2.545890000 |
| C | 3.657636000  | -0.080874000 | -4.023032000 |
| H | 4.185680000  | 0.316172000  | -4.886986000 |
| C | 2.667270000  | -1.045882000 | -4.178074000 |
| H | 2.418421000  | -1.437422000 | -5.161152000 |
| C | 1.985452000  | -1.555996000 | -3.063405000 |
| C | 0.998323000  | -2.667003000 | -3.246925000 |
| H | 0.981951000  | -3.317195000 | -2.372941000 |
| H | -0.014204000 | -2.282363000 | -3.405023000 |
| H | 1.277097000  | -3.250505000 | -4.129292000 |
| C | 2.775819000  | -0.289116000 | 2.021224000  |
| H | 3.707684000  | -0.267122000 | 2.595515000  |
| H | 2.416206000  | 0.738004000  | 1.897954000  |
| C | 1.708756000  | -1.081663000 | 2.706865000  |
| C | 1.732477000  | -1.301166000 | 4.078886000  |
| H | 2.581661000  | -0.954262000 | 4.661203000  |
| C | 0.655909000  | -1.963819000 | 4.668721000  |
| H | 0.639777000  | -2.161398000 | 5.737953000  |
| C | -0.401320000 | -2.358578000 | 3.856505000  |
| H | -1.269451000 | -2.859481000 | 4.276028000  |
| C | -0.374679000 | -2.119512000 | 2.473566000  |
| C | -1.400158000 | -1.032952000 | -1.339490000 |

|   |              |              |              |
|---|--------------|--------------|--------------|
| O | 0.905461000  | 0.488973000  | -0.303014000 |
| C | -2.264436000 | -1.672742000 | -2.384052000 |
| C | -2.576096000 | -0.957413000 | -3.552107000 |
| C | -2.741726000 | -2.982167000 | -2.216020000 |
| H | -2.176530000 | 0.044218000  | -3.692601000 |
| H | -2.502856000 | -3.535364000 | -1.311475000 |
| C | -3.356401000 | -1.550733000 | -4.548409000 |
| C | -3.542862000 | -3.562097000 | -3.204187000 |
| H | -3.579170000 | -0.998911000 | -5.459562000 |
| H | -3.926342000 | -4.570864000 | -3.063970000 |
| C | -3.847278000 | -2.850620000 | -4.372102000 |
| H | -4.462402000 | -3.309437000 | -5.143898000 |
| H | -1.658828000 | 7.450903000  | 0.951823000  |
| C | 1.479244000  | 3.190578000  | -1.126922000 |
| H | 1.368812000  | 2.636253000  | -0.202221000 |
| H | 2.450551000  | 2.970217000  | -1.578462000 |
| H | 1.454198000  | 4.266066000  | -0.903328000 |
| H | 3.406580000  | -6.269176000 | 2.618122000  |
| C | -1.551154000 | -2.532828000 | 1.645807000  |
| H | -1.267418000 | -3.244097000 | 0.870436000  |
| H | -2.304324000 | -2.994280000 | 2.287948000  |
| H | -1.996138000 | -1.664665000 | 1.153897000  |

***Cartesian coordinates for the optimized structure of I-OOH:***

| Atom | Coordinates (Angstroms) |   |   |
|------|-------------------------|---|---|
|      | X                       | Y | Z |

-----

|    |              |              |              |
|----|--------------|--------------|--------------|
| Co | -1.499135000 | 1.733581000  | 0.087268000  |
| O  | 0.159974000  | 1.009273000  | 0.789197000  |
| N  | -1.465791000 | 3.586544000  | 0.795786000  |
| N  | -3.258457000 | 2.096705000  | -0.621380000 |
| N  | -2.559958000 | 0.996694000  | 1.604289000  |
| N  | -0.804135000 | 2.487916000  | -1.626152000 |
| C  | 0.748544000  | 3.743677000  | 2.013170000  |
| H  | 0.904745000  | 2.688066000  | 1.821398000  |
| H  | 0.634146000  | 3.887462000  | 3.094988000  |
| H  | 1.639237000  | 4.300661000  | 1.708555000  |
| C  | -0.461725000 | 4.325553000  | 1.339534000  |
| C  | -0.563669000 | 5.727657000  | 1.365007000  |
| H  | 0.265685000  | 6.286334000  | 1.790906000  |
| C  | -1.681284000 | 6.381798000  | 0.869415000  |
| C  | -2.737323000 | 5.604537000  | 0.390872000  |
| H  | -3.660684000 | 6.047870000  | 0.028481000  |
| C  | -2.599023000 | 4.225698000  | 0.385819000  |
| C  | -3.747378000 | 3.342341000  | 0.033334000  |
| H  | -4.247366000 | 3.053708000  | 0.965449000  |
| H  | -4.480534000 | 3.844517000  | -0.603421000 |
| C  | -4.129204000 | 0.944885000  | -0.231833000 |
| H  | -3.971577000 | 0.125869000  | -0.934843000 |
| H  | -5.181117000 | 1.249783000  | -0.284334000 |
| C  | -3.758329000 | 0.539346000  | 1.155760000  |
| C  | -4.612403000 | -0.224241000 | 1.942358000  |
| H  | -5.557927000 | -0.563480000 | 1.527853000  |
| C  | -4.227821000 | -0.525862000 | 3.246993000  |

|    |              |              |              |
|----|--------------|--------------|--------------|
| H  | -4.852949000 | -1.146864000 | 3.883760000  |
| C  | -3.050758000 | 0.034831000  | 3.735375000  |
| H  | -2.749788000 | -0.114096000 | 4.768518000  |
| C  | -2.238872000 | 0.829117000  | 2.916567000  |
| C  | -1.091381000 | 1.567714000  | 3.532929000  |
| H  | -1.307884000 | 2.641136000  | 3.509273000  |
| H  | -0.132362000 | 1.403983000  | 3.040639000  |
| H  | -0.981725000 | 1.260971000  | 4.575176000  |
| C  | -3.179690000 | 2.199930000  | -2.107274000 |
| H  | -3.874066000 | 2.969666000  | -2.459924000 |
| H  | -3.500098000 | 1.245188000  | -2.532681000 |
| C  | -1.789267000 | 2.505899000  | -2.556918000 |
| C  | -1.552756000 | 2.772202000  | -3.902106000 |
| H  | -2.386314000 | 2.768648000  | -4.599687000 |
| C  | -0.246298000 | 3.016150000  | -4.316812000 |
| H  | -0.015491000 | 3.190839000  | -5.364904000 |
| C  | 0.749012000  | 3.072511000  | -3.347330000 |
| H  | 1.773646000  | 3.318725000  | -3.612339000 |
| C  | 0.452518000  | 2.851121000  | -1.996305000 |
| Co | 1.326188000  | -1.421703000 | -0.009904000 |
| O  | -0.378990000 | -1.756608000 | -0.796370000 |
| O  | -1.703511000 | 0.113530000  | -0.899290000 |
| N  | 1.939474000  | -3.340709000 | 0.286461000  |
| N  | 3.059643000  | -0.874029000 | 0.633475000  |
| N  | 2.201264000  | -1.165696000 | -1.761455000 |
| N  | 0.766158000  | -1.519852000 | 1.925436000  |
| C  | -0.011221000 | -4.724459000 | -0.475461000 |

|   |              |              |              |
|---|--------------|--------------|--------------|
| H | -0.433228000 | -3.799820000 | -0.855219000 |
| H | 0.205466000  | -5.381087000 | -1.328497000 |
| H | -0.743544000 | -5.245755000 | 0.149933000  |
| C | 1.262068000  | -4.516960000 | 0.289556000  |
| C | 1.785792000  | -5.632088000 | 0.967402000  |
| H | 1.203740000  | -6.550138000 | 0.962155000  |
| C | 3.007482000  | -5.567395000 | 1.620709000  |
| C | 3.733103000  | -4.376861000 | 1.538900000  |
| H | 4.715541000  | -4.269525000 | 1.990202000  |
| C | 3.175415000  | -3.306385000 | 0.856881000  |
| C | 3.957542000  | -2.062352000 | 0.605032000  |
| H | 4.385539000  | -2.128006000 | -0.402106000 |
| H | 4.777994000  | -1.930984000 | 1.316272000  |
| C | 3.584005000  | 0.170232000  | -0.291248000 |
| H | 3.191730000  | 1.141539000  | 0.008561000  |
| H | 4.678194000  | 0.204540000  | -0.224935000 |
| C | 3.139059000  | -0.186479000 | -1.675814000 |
| C | 3.678889000  | 0.427689000  | -2.799258000 |
| H | 4.428146000  | 1.205319000  | -2.676020000 |
| C | 3.238813000  | 0.018071000  | -4.056967000 |
| H | 3.613112000  | 0.495083000  | -4.959629000 |
| C | 2.357209000  | -1.057160000 | -4.135382000 |
| H | 2.053830000  | -1.459881000 | -5.098025000 |
| C | 1.865818000  | -1.671160000 | -2.976177000 |
| C | 1.063711000  | -2.928916000 | -3.091470000 |
| H | 1.468374000  | -3.684488000 | -2.413708000 |
| H | 0.009146000  | -2.780190000 | -2.853246000 |

|   |              |              |              |
|---|--------------|--------------|--------------|
| H | 1.134582000  | -3.303616000 | -4.115340000 |
| C | 2.874339000  | -0.336892000 | 2.006944000  |
| H | 3.820516000  | -0.350804000 | 2.556169000  |
| H | 2.550914000  | 0.705497000  | 1.915414000  |
| C | 1.809037000  | -1.111654000 | 2.708854000  |
| C | 1.846177000  | -1.313368000 | 4.080609000  |
| H | 2.709232000  | -0.973548000 | 4.646135000  |
| C | 0.764659000  | -1.945401000 | 4.694202000  |
| H | 0.758015000  | -2.123207000 | 5.766845000  |
| C | -0.308591000 | -2.339194000 | 3.903014000  |
| H | -1.176881000 | -2.819966000 | 4.344514000  |
| C | -0.302823000 | -2.130898000 | 2.516965000  |
| C | -1.322179000 | -1.043261000 | -1.245178000 |
| O | 0.950363000  | 0.380361000  | -0.274480000 |
| C | -2.149511000 | -1.663064000 | -2.330768000 |
| C | -2.244080000 | -1.012557000 | -3.572154000 |
| C | -2.805511000 | -2.886202000 | -2.120333000 |
| H | -1.712727000 | -0.077611000 | -3.736805000 |
| H | -2.741853000 | -3.382069000 | -1.154968000 |
| C | -2.983329000 | -1.594624000 | -4.605513000 |
| C | -3.561649000 | -3.450490000 | -3.152201000 |
| H | -3.040008000 | -1.098822000 | -5.572458000 |
| H | -4.082146000 | -4.391362000 | -2.985408000 |
| C | -3.646750000 | -2.810164000 | -4.394896000 |
| H | -4.228365000 | -3.258028000 | -5.198291000 |
| H | -1.741256000 | 7.467431000  | 0.872875000  |
| C | 1.517088000  | 3.154838000  | -0.993391000 |



|   |              |              |              |
|---|--------------|--------------|--------------|
| H | 1.435573000  | 2.569259000  | -0.085836000 |
| H | 2.501826000  | 2.989134000  | -1.437742000 |
| H | 1.450230000  | 4.220102000  | -0.735438000 |
| H | 3.398310000  | -6.425172000 | 2.162808000  |
| C | -1.505975000 | -2.550156000 | 1.731255000  |
| H | -1.252067000 | -3.246650000 | 0.935183000  |
| H | -2.221363000 | -3.029945000 | 2.401593000  |
| H | -1.995341000 | -1.686437000 | 1.272004000  |
| H | -0.057490000 | 0.235533000  | 1.349923000  |

***Cartesian coordinates for the optimized structure of I-O2H2:***

| Atom  | Coordinates (Angstroms) |              |             |
|-------|-------------------------|--------------|-------------|
|       | X                       | Y            | Z           |
| ----- |                         |              |             |
| Co    | -1.459864000            | 0.154543000  | 1.833039000 |
| O     | 0.093928000             | -0.876857000 | 0.973690000 |
| N     | -1.662022000            | -0.716804000 | 3.573424000 |
| N     | -2.838650000            | 1.378875000  | 2.305374000 |
| N     | -2.957963000            | -0.830797000 | 0.961782000 |
| N     | -0.220895000            | 1.428074000  | 2.787895000 |
| C     | -0.031328000            | -2.664004000 | 3.461353000 |
| H     | 0.212304000             | -2.398589000 | 2.439179000 |
| H     | -0.514541000            | -3.648522000 | 3.460699000 |
| H     | 0.900213000             | -2.767611000 | 4.025018000 |
| C     | -0.932879000            | -1.696784000 | 4.174243000 |
| C     | -1.049830000            | -1.887805000 | 5.561950000 |

|   |              |              |              |
|---|--------------|--------------|--------------|
| H | -0.449297000 | -2.673882000 | 6.012041000  |
| C | -1.890559000 | -1.103636000 | 6.336878000  |
| C | -2.670929000 | -0.143394000 | 5.692921000  |
| H | -3.378226000 | 0.481695000  | 6.231009000  |
| C | -2.543712000 | 0.005325000  | 4.321887000  |
| C | -3.473428000 | 0.887560000  | 3.566756000  |
| H | -4.347939000 | 0.289003000  | 3.284751000  |
| H | -3.820151000 | 1.736623000  | 4.161481000  |
| C | -3.850579000 | 1.395992000  | 1.211621000  |
| H | -3.523539000 | 2.090378000  | 0.437750000  |
| H | -4.804535000 | 1.765837000  | 1.605414000  |
| C | -3.976730000 | 0.019247000  | 0.665705000  |
| C | -5.075891000 | -0.349581000 | -0.098709000 |
| H | -5.850171000 | 0.384862000  | -0.302866000 |
| C | -5.142500000 | -1.652440000 | -0.583783000 |
| H | -5.970212000 | -1.974284000 | -1.210717000 |
| C | -4.145483000 | -2.546559000 | -0.204667000 |
| H | -4.189125000 | -3.589379000 | -0.506249000 |
| C | -3.073407000 | -2.138071000 | 0.597479000  |
| C | -2.134907000 | -3.175452000 | 1.121712000  |
| H | -2.246036000 | -3.239913000 | 2.207805000  |
| H | -1.084107000 | -2.998981000 | 0.886670000  |
| H | -2.392267000 | -4.147272000 | 0.695780000  |
| C | -2.225678000 | 2.736197000  | 2.427731000  |
| H | -2.848154000 | 3.357540000  | 3.079108000  |
| H | -2.216276000 | 3.190063000  | 1.434896000  |
| C | -0.831885000 | 2.632940000  | 2.932680000  |

|    |              |              |              |
|----|--------------|--------------|--------------|
| C  | -0.204693000 | 3.746364000  | 3.475922000  |
| H  | -0.757626000 | 4.677851000  | 3.561916000  |
| C  | 1.121917000  | 3.633215000  | 3.883003000  |
| H  | 1.659018000  | 4.487653000  | 4.287276000  |
| C  | 1.728290000  | 2.386453000  | 3.792522000  |
| H  | 2.746190000  | 2.235688000  | 4.141178000  |
| C  | 1.040703000  | 1.276974000  | 3.282516000  |
| Co | 1.447436000  | -0.011734000 | -1.491939000 |
| O  | -0.444021000 | 0.366937000  | -1.778678000 |
| O  | -1.109547000 | 1.282672000  | 0.173765000  |
| N  | 2.098596000  | -0.202744000 | -3.343295000 |
| N  | 3.259356000  | -0.232899000 | -0.895705000 |
| N  | 1.898958000  | 1.894649000  | -1.282406000 |
| N  | 1.317583000  | -2.011539000 | -1.515891000 |
| C  | 0.009100000  | 0.078737000  | -4.739063000 |
| H  | -0.517274000 | 0.356757000  | -3.833157000 |
| H  | 0.043734000  | 0.953701000  | -5.401197000 |
| H  | -0.547147000 | -0.700383000 | -5.269669000 |
| C  | 1.420378000  | -0.374814000 | -4.508922000 |
| C  | 2.082918000  | -0.928885000 | -5.618254000 |
| H  | 1.506453000  | -1.067758000 | -6.529132000 |
| C  | 3.422946000  | -1.279590000 | -5.563106000 |
| C  | 4.123558000  | -1.014541000 | -4.384818000 |
| H  | 5.185492000  | -1.221227000 | -4.285623000 |
| C  | 3.436251000  | -0.469485000 | -3.313535000 |
| C  | 4.143486000  | -0.030443000 | -2.080377000 |
| H  | 4.344585000  | 1.043787000  | -2.166168000 |

|   |              |              |              |
|---|--------------|--------------|--------------|
| H | 5.094352000  | -0.548376000 | -1.928707000 |
| C | 3.541308000  | 0.818069000  | 0.128686000  |
| H | 3.238512000  | 0.457555000  | 1.111550000  |
| H | 4.620241000  | 1.010725000  | 0.163090000  |
| C | 2.791283000  | 2.051871000  | -0.266360000 |
| C | 3.011759000  | 3.278783000  | 0.344507000  |
| H | 3.725519000  | 3.350990000  | 1.160500000  |
| C | 2.302683000  | 4.385834000  | -0.118977000 |
| H | 2.418968000  | 5.357335000  | 0.355057000  |
| C | 1.493595000  | 4.238849000  | -1.244124000 |
| H | 0.999148000  | 5.097622000  | -1.689870000 |
| C | 1.321913000  | 2.989201000  | -1.850313000 |
| C | 0.612073000  | 2.889454000  | -3.164143000 |
| H | 1.276655000  | 2.419859000  | -3.896161000 |
| H | -0.313859000 | 2.316435000  | -3.120230000 |
| H | 0.366146000  | 3.894291000  | -3.513936000 |
| C | 3.377821000  | -1.601439000 | -0.316075000 |
| H | 4.423581000  | -1.922405000 | -0.321072000 |
| H | 3.042980000  | -1.556589000 | 0.725433000  |
| C | 2.495249000  | -2.538456000 | -1.067973000 |
| C | 2.829605000  | -3.875391000 | -1.216944000 |
| H | 3.789328000  | -4.227989000 | -0.849687000 |
| C | 1.916358000  | -4.728259000 | -1.836352000 |
| H | 2.144402000  | -5.781893000 | -1.977512000 |
| C | 0.704555000  | -4.200001000 | -2.264722000 |
| H | -0.041974000 | -4.833205000 | -2.735183000 |
| C | 0.409316000  | -2.838468000 | -2.110646000 |

|   |              |              |              |
|---|--------------|--------------|--------------|
| C | -1.284267000 | 1.018791000  | -1.100280000 |
| O | 0.986047000  | 0.135915000  | 0.410224000  |
| C | -2.446193000 | 1.587814000  | -1.800310000 |
| C | -2.802001000 | 2.929488000  | -1.551706000 |
| C | -3.139610000 | 0.832246000  | -2.763766000 |
| H | -2.221370000 | 3.526678000  | -0.851405000 |
| H | -2.861617000 | -0.201175000 | -2.949074000 |
| C | -3.862419000 | 3.500628000  | -2.254890000 |
| C | -4.218468000 | 1.404612000  | -3.437165000 |
| H | -4.127691000 | 4.540484000  | -2.079157000 |
| H | -4.778015000 | 0.813458000  | -4.158264000 |
| C | -4.578526000 | 2.735330000  | -3.185279000 |
| H | -5.414877000 | 3.179792000  | -3.720787000 |
| H | -1.950330000 | -1.244453000 | 7.413200000  |
| C | 1.716580000  | -0.052017000 | 3.403398000  |
| H | 1.444586000  | -0.768802000 | 2.637045000  |
| H | 2.800355000  | 0.088607000  | 3.384607000  |
| H | 1.467943000  | -0.476271000 | 4.384645000  |
| H | 3.918717000  | -1.728198000 | -6.420417000 |
| C | -0.930751000 | -2.350629000 | -2.563937000 |
| H | -0.852072000 | -1.562973000 | -3.309609000 |
| H | -1.482210000 | -3.184256000 | -3.002960000 |
| H | -1.521658000 | -1.960972000 | -1.730923000 |
| H | -0.075910000 | -1.457658000 | 0.200809000  |
| H | 0.249559000  | 0.902719000  | 0.357522000  |

*Cartesian coordinates for the optimized structure of Co-O2H:*

| Atom  | Coordinates (Angstroms) |              |              |
|-------|-------------------------|--------------|--------------|
|       | X                       | Y            | Z            |
| ----- |                         |              |              |
| Co    | -0.020715000            | 0.021940000  | 0.330614000  |
| O     | 1.275593000             | -2.304772000 | 2.337758000  |
| O     | 0.104676000             | -1.881555000 | 0.446986000  |
| N     | 0.082935000             | 1.996835000  | -0.169519000 |
| N     | 0.013292000             | -0.332295000 | -1.624089000 |
| N     | -1.967896000            | -0.187259000 | 0.033638000  |
| N     | 1.988079000             | 0.095900000  | 0.212487000  |
| C     | 0.109687000             | 3.156304000  | 2.059959000  |
| H     | -0.108669000            | 2.178564000  | 2.486913000  |
| H     | -0.748491000            | 3.819857000  | 2.232969000  |
| H     | 0.970065000             | 3.611869000  | 2.562054000  |
| C     | 0.360036000             | 3.095034000  | 0.581059000  |
| C     | 0.842580000             | 4.268645000  | -0.026128000 |
| H     | 1.069276000             | 5.116700000  | 0.614901000  |
| C     | 1.023803000             | 4.346881000  | -1.398821000 |
| C     | 0.668340000             | 3.237079000  | -2.167510000 |
| H     | 0.752428000             | 3.238972000  | -3.250628000 |
| C     | 0.196403000             | 2.102297000  | -1.522931000 |
| C     | -0.310335000            | 0.938817000  | -2.309992000 |
| H     | -1.402471000            | 1.020126000  | -2.363295000 |
| H     | 0.075735000             | 0.938290000  | -3.334394000 |
| C     | -1.043686000            | -1.332592000 | -1.898481000 |
| H     | -0.648033000            | -2.322356000 | -1.671706000 |
| H     | -1.334915000            | -1.310200000 | -2.955541000 |

|   |              |              |              |
|---|--------------|--------------|--------------|
| C | -2.214354000 | -1.013524000 | -1.015414000 |
| C | -3.482579000 | -1.510267000 | -1.296792000 |
| H | -3.623159000 | -2.165741000 | -2.152079000 |
| C | -4.544711000 | -1.134306000 | -0.475528000 |
| H | -5.548073000 | -1.514452000 | -0.652409000 |
| C | -4.300370000 | -0.216602000 | 0.542038000  |
| H | -5.111687000 | 0.154969000  | 1.162210000  |
| C | -3.006809000 | 0.272498000  | 0.774490000  |
| C | -2.807954000 | 1.351205000  | 1.793069000  |
| H | -2.208463000 | 2.158843000  | 1.367757000  |
| H | -2.286856000 | 0.975798000  | 2.676133000  |
| H | -3.782742000 | 1.749625000  | 2.086993000  |
| C | 1.365288000  | -0.828292000 | -1.950482000 |
| H | 1.601361000  | -0.674616000 | -3.008744000 |
| H | 1.375268000  | -1.905283000 | -1.750854000 |
| C | 2.382877000  | -0.184194000 | -1.058751000 |
| C | 3.683917000  | 0.009364000  | -1.509292000 |
| H | 3.929446000  | -0.215302000 | -2.543535000 |
| C | 4.640442000  | 0.481099000  | -0.611481000 |
| H | 5.666606000  | 0.655087000  | -0.926328000 |
| C | 4.250210000  | 0.703684000  | 0.703480000  |
| H | 4.968869000  | 1.038761000  | 1.446334000  |
| C | 2.920585000  | 0.503702000  | 1.111593000  |
| C | 0.826171000  | -2.626542000 | 1.221295000  |
| C | 2.591726000  | 0.706852000  | 2.558938000  |
| H | 1.901900000  | 1.537445000  | 2.709987000  |
| H | 2.111242000  | -0.189124000 | 2.957523000  |

|   |              |              |              |
|---|--------------|--------------|--------------|
| H | 3.517330000  | 0.913238000  | 3.103021000  |
| C | 1.101760000  | -3.998288000 | 0.675766000  |
| C | 2.216144000  | -4.708950000 | 1.153361000  |
| C | 0.274733000  | -4.583841000 | -0.297629000 |
| H | 2.847012000  | -4.253244000 | 1.913310000  |
| H | -0.606815000 | -4.050804000 | -0.644304000 |
| C | 2.511475000  | -5.977856000 | 0.647017000  |
| C | 0.559575000  | -5.860891000 | -0.789674000 |
| H | 3.384583000  | -6.516543000 | 1.010612000  |
| H | -0.093684000 | -6.312745000 | -1.533665000 |
| C | 1.683427000  | -6.556305000 | -0.324313000 |
| H | 1.910193000  | -7.547268000 | -0.713453000 |
| O | -0.142770000 | 0.311342000  | 2.139816000  |
| O | -0.810789000 | -0.745157000 | 2.847507000  |
| H | -0.064302000 | -1.396765000 | 2.895446000  |
| H | 1.415762000  | 5.248910000  | -1.862404000 |

## References

1. B. Chakraborty, I. Ghosh, R. D. Jana and T. K. Paine, *Dalton Trans.*, 2020, **49**, 3463-3472.

.....
